# Supplementary material for: A clinical-grade universal foundation model for intraoperative pathology
Source: Research Square preprint supplement (doi:10.21203/rs.3.rs-7805546/v1), 2025-10-14
Supplement: Supplementary file 1 [file f14e3ca1bdf5fbd39bfccc44.docx]

**Supplementary Figures**

Figure S1. Extended Performance of CRISP in common benign–malignant differentiation tasks.

(A) Predictive performance in SYCC cohort. (B) Confusion matrices showing CRISP’s predictions for common benign–malignant differentiation tasks.

Figure S2. Extended attention visualization of CRISP predictions on malignant thyroid (A), head and neck (B), brain (C) and ovary (D) WSIs, showing the original WSIs and CRISP heatmaps.

Figure S3. Extended Evaluation of CRISP for intraoperative decision-making.

(A) Data composition of the SYCC validation cohort for the PCNSLD task (top) and CNSLC task (bottom). (B) Comparison of AUROC between CRISP and other models on SYCC validation cohorts for the PCNSLD task. (C) Top-k accuracy comparison of CRISP and other models in SYCC validation cohorts for the CNSLC task. (D) Data composition of SYCC validation cohorts for the OCCGS, OCFGS, TNDD, and PGD tasks. (E) Predicted probability distributions of CRISP across classes in the OCCGS task in the SYCC validation cohort. (F) Predicted probability distributions of CRISP across classes in the TNDD task in the SYCC validation cohort. (G) Top-k accuracy comparison of CRISP and other models in the SYCC validation cohort for the OCFGS task. (H) Specificity comparison of CRISP and other models at 95% sensitivity for the PGD task in the SYCC validation cohort.

Figure S4. Confusion matrices showing CRISP’s predictions for preoperative and intraoperative decision-making tasks.

Figure S5. Confusion matrices showing CRISP’s predictions in late intraoperative assessment.

| Characteristics | Number of Patients |
| --- | --- |
| **Patient Counts** | 20457 |
| **Slide Counts** | 48191 |
| **Data Collection Period** | 2017.5-2023.2 |
| **Age, median (range)** | 49.39 (1, 94) |
| **Sex** |  |
| Male | 6856 |
| Female | 13601 |
| **Specimen Site** |  |
| Lung | 5158 |
| Breast | 4014 |
| Thyroid | 4135 |
| Head & Neck | 1917 |
| Brain | 1564 |
| Ovary | 1553 |
| Lymph Node | 414 |
| Uterus | 286 |
| Cervix | 37 |
| Skin | 46 |
| Bile Duct | 47 |
| Soft Tissue | 89 |
| Liver | 292 |
| Pancreas | 21 |
| Colorectum | 107 |
| Pleura | 25 |
| Stomach | 204 |
| Bone | 20 |
| Esophagus | 24 |
| Kidney | 142 |
| Bladder | 306 |
| Adrenal Gland | 2 |
| Testis | 32 |
| Thymus | 22 |
| **Diagnosis** |  |
| Malignant | 9014 |
| Benign | 11443 |

Table S1.1. Baseline characteristics of patients in the retrospective SYCC cohort.

| Characteristics | Number of Patients |
| --- | --- |
| **Patient Counts** | 4719 |
| **Slide Counts** | 11879 |
| **Data Collection Period** | 2020.7-2024.7 |
| **Age, median (range)** | 49.16 (3, 87) |
| **Sex** |  |
| Male | 1145 |
| Female | 3574 |
| **Specimen Site** |  |
| Lung | 1224 |
| Breast | 621 |
| Thyroid | 1798 |
| Ovary | 756 |
| Lymph Node | 320 |
| **Diagnosis** |  |
| Malignant | 2737 |
| Benign | 1982 |

Table S1.2. Baseline characteristics of patients in the retrospective ZJH cohort.

| Characteristics | Number of Patients |
| --- | --- |
| **Patient Counts** | 7210 |
| **Slide Counts** | 10800 |
| **Data Collection Period** | 2023.3-2024.7 |
| **Age, median (range)** | 47.70 (5, 94) |
| **Sex** |  |
| Male | 1345 |
| Female | 5865 |
| **Specimen Site** |  |
| Lung | 1558 |
| Breast | 2822 |
| Thyroid | 713 |
| Head & Neck | 647 |
| Brain | 153 |
| Ovary | 371 |
| Lymph Node | 671 |
| Uterus | 99 |
| Cervix | 5 |
| Skin | 41 |
| Bile Duct | 3 |
| Soft Tissue | 10 |
| Liver | 29 |
| Pancreas | 9 |
| Colorectum | 20 |
| Pleura | 13 |
| Stomach | 6 |
| Bone | 7 |
| Esophagus | 6 |
| Kidney | 7 |
| Bladder | 10 |
| Testis | 1 |
| Thymus | 9 |
| **Diagnosis** |  |
| Malignant | 3297 |
| Benign | 3913 |

Table S1.3. Baseline characteristics of patients in the retrospective JMH cohort.

| Characteristics | Number of Patients |
| --- | --- |
| **Patient Counts** | 1676 |
| **Slide Counts** | 5000 |
| **Data Collection Period** | 2022.1-2023.11 |
| **Age, median (range)** | 49.45 (8, 90) |
| **Sex** |  |
| Male | 604 |
| Female | 1072 |
| **Specimen Site** |  |
| Lung | 201 |
| Breast | 186 |
| Thyroid | 182 |
| Head & Neck | 207 |
| Brain | 30 |
| Ovary | 38 |
| Lymph Node | 486 |
| Uterus | 145 |
| Cervix | 43 |
| Skin | 42 |
| Bile Duct | 35 |
| Soft Tissue | 29 |
| Liver | 13 |
| Pancreas | 13 |
| Colorectum | 7 |
| Pleura | 7 |
| Stomach | 3 |
| Esophagus | 2 |
| Kidney | 3 |
| Bladder | 1 |
| Adrenal Gland | 1 |
| Testis | 1 |
| Thymus | 1 |
| **Diagnosis** |  |
| Malignant | 614 |
| Benign | 1062 |

Table S1.4. Baseline characteristics of patients in the retrospective ZSH cohort.

| Characteristics | Number of Patients |
| --- | --- |
| **Patient Counts** | 3344 |
| **Slide Counts** | 4714 |
| **Data Collection Period** | 2023.3-2024.1 |
| **Age, median (range)** | 50.85 (2, 90) |
| **Sex** |  |
| Male | 1121 |
| Female | 2223 |
| **Specimen Site** |  |
| Lung | 561 |
| Breast | 682 |
| Thyroid | 206 |
| Head & Neck | 293 |
| Brain | 669 |
| Ovary | 119 |
| Lymph Node | 241 |
| Uterus | 35 |
| Cervix | 77 |
| Skin | 56 |
| Bile Duct | 35 |
| Soft Tissue | 50 |
| Liver | 25 |
| Pancreas | 8 |
| Colorectum | 146 |
| Pleura | 11 |
| Stomach | 37 |
| Bone | 44 |
| Esophagus | 31 |
| Kidney | 3 |
| Bladder | 1 |
| Testis | 2 |
| Thymus | 12 |
| **Diagnosis** |  |
| Malignant | 1779 |
| Benign | 1565 |

Table S1.5. Baseline characteristics of patients in the retrospective NFH cohort.

| Characteristics | Number of Patients |
| --- | --- |
| **Patient Counts** | 508 |
| **Slide Counts** | 754 |
| **Data Collection Period** | 2023.7-2024.4 |
| **Age, median (range)** | 51.96 (15, 83) |
| **Sex** |  |
| Male | 129 |
| Female | 379 |
| **Specimen Site** |  |
| Lung | 142 |
| Breast | 220 |
| Thyroid | 59 |
| Head & Neck | 19 |
| Brain | 16 |
| Ovary | 16 |
| Lymph Node | 15 |
| Uterus | 4 |
| Cervix | 1 |
| Skin | 2 |
| Bile Duct | 3 |
| Soft Tissue | 2 |
| Pleura | 5 |
| Bladder | 2 |
| Testis | 1 |
| Thymus | 1 |
| **Diagnosis** |  |
| Malignant | 273 |
| Benign | 235 |

Table S1.6. Baseline characteristics of patients in the retrospective GZH cohort.

| Characteristics | Number of Patients |
| --- | --- |
| **Patient Counts** | 225 |
| **Slide Counts** | 226 |
| **Data Collection Period** | 2023.11-2024.4 |
| **Age, median (range)** | 44.75 (14, 81) |
| **Sex** |  |
| Male | 28 |
| Female | 197 |
| **Specimen Site** |  |
| Lung | 9 |
| Breast | 68 |
| Thyroid | 45 |
| Head & Neck | 6 |
| Brain | 4 |
| Ovary | 26 |
| Lymph Node | 9 |
| Uterus | 35 |
| Cervix | 9 |
| Skin | 4 |
| Soft Tissue | 3 |
| Liver | 1 |
| Pancreas | 1 |
| Colorectum | 2 |
| Pleura | 1 |
| Thymus | 2 |
| **Diagnosis** |  |
| Malignant | 47 |
| Benign | 178 |

Table S1.7. Baseline characteristics of patients in the retrospective HZH cohort.

| Characteristics | Number of Patients |
| --- | --- |
| **Patient Counts** | 114 |
| **Slide Counts** | 114 |
| **Data Collection Period** | 2023.10-2024.2 |
| **Age, median (range)** | 46.54 (26, 81) |
| **Sex** |  |
| Male | 27 |
| Female | 87 |
| **Specimen Site** |  |
| Breast | 26 |
| Thyroid | 78 |
| Ovary | 3 |
| Skin | 2 |
| Liver | 1 |
| Pancreas | 1 |
| Colorectum | 2 |
| Bone | 1 |
| **Diagnosis** |  |
| Malignant | 114 |
| Benign | 0 |

Table S1.8. Baseline characteristics of patients in the retrospective DGH cohort.

| Characteristics | Number of Patients |
| --- | --- |
| **Patient Counts** | 1330 |
| **Slide Counts** | 1570 |
| **Received Date** | 2024.11.11-2025.7.1 |
| **Age, median (range)** | 41.69 (18, 80) |
| **Sex** |  |
| Male | 374 |
| Female | 956 |
| **Diagnosis** |  |
| Malignant | 1088 |
| Benign | 242 |

Table S1.9. Baseline characteristics of patients in the prospective PCS-THYR cohort.

| Characteristics | Number of Patients |
| --- | --- |
| **Patient Counts** | 391 |
| **Slide Counts** | 1770 |
| **Received Date** | 2024.11.12-2025.5.1 |
| **Age, median (range)** | 48.85 (18, 87) |
| **Sex** |  |
| Male | 1 |
| Female | 390 |
| **Diagnosis** |  |
| Malignant | 119 |
| Benign | 272 |

Table S1.10. Baseline characteristics of patients in the prospective PCS-BREA cohort.

| Characteristics | Number of Patients |
| --- | --- |
| **Patient Counts** | 350 |
| **Slide Counts** | 803 |
| **Received Date** | 2024.12.4-2025.5.1 |
| **Age, median (range)** | 56.94 (24, 82) |
| **Sex** |  |
| Male | 136 |
| Female | 214 |
| **Diagnosis** |  |
| Malignant | 284 |
| Benign | 66 |

Table S1.11. Baseline characteristics of patients in the prospective PCS-LUNG cohort.

| Cohort | Data Split | Sites | | | | | | |
| --- | --- | --- | --- | --- | --- | --- | --- | --- |
| Lung | Breast | Thyroid | H&N | Brain | Ovary | Abdomen |
| SYCC | Internal-Train | 257 | 272 | 296 | 261 | 234 | 253 | 208 |
| Internal-Validation | 110 | 97 | 89 | 87 | 108 | 112 | 95 |
| Internal-Test | 147 | 133 | 163 | 131 | 165 | 134 | 139 |
| ZSH | External-Test | 176 | 119 | 186 | 110 | 37 | 171 | 70 |
| NFH | External-Test | 240 | 209 | 216 | 125 | 482 | 190 | 137 |
| GZH | External-Test | 0 | 187 | 0 | 13 | 12 | 0 | 0 |
| DGH | External-Test | 0 | 26 | 0 | 0 | 0 | 0 | 0 |
| HZH | External-Test | 0 | 63 | 0 | 2 | 0 | 0 | 0 |
|  | Sum | 930 | 1106 | 950 | 729 | 1038 | 860 | 649 |

Table S2.1. Data composition across 21 benign-malignant classification tasks

| Model | AUROC | Spe (at 90% Sen) | Spe (at 95% Sen) | Accuracy | F1 |
| --- | --- | --- | --- | --- | --- |
| CHIEF | 0.897±0.091 | 0.612±0.285 | 0.431±0.287 | 0.863±0.088 | 0.822±0.125 |
| CONCH | 0.942±0.042 | 0.802±0.188 | 0.607±0.260 | 0.914±0.047 | 0.885±0.085 |
| UNI | 0.947±0.032 | 0.877±0.195 | 0.591±0.277 | 0.924±0.033 | 0.898±0.066 |
| Virchow | 0.944±0.032 | 0.777±0.205 | 0.565±0.274 | 0.892±0.055 | 0.866±0.077 |
| Virchow2 | 0.953±0.030 | 0.840±0.142 | 0.644±0.274 | 0.927±0.041 | 0.901±0.065 |
| CRISP | **0.970±0.022** | **0.893±0.100** | **0.718±0.264** | **0.945±0.033** | **0.924±0.053** |

Table S2.2. Average performance of various models across 21 benign-malignant differentiation tasks.

| Cohort | Model | AUROC | Spe (at 90% Sen) | Spe (at 95% Sen) | Accuracy | F1 |
| --- | --- | --- | --- | --- | --- | --- |
| SYCC | CHIEF | 0.988 (0.971, 1.000) | **1.000 (1.000, 1.000)** | 0.902 (0.836, 0.963) | 0.980 (0.952, 1.000) | 0.976 (0.941, 1.000) |
| CONCH | **0.999 (0.996, 1.000)** | **1.000 (1.000, 1.000)** | **1.000 (1.000, 1.000)** | 0.986 (0.966, 1.000) | 0.984 (0.961, 1.000) |
| UNI | 0.996 (0.990, 1.000) | **1.000 (1.000, 1.000)** | **1.000 (1.000, 1.000)** | 0.986 (0.966, 1.000) | 0.984 (0.960, 1.000) |
| Virchow | 0.997 (0.992, 1.000) | **1.000 (1.000, 1.000)** | 0.976 (0.938, 1.000) | 0.973 (0.946, 0.993) | 0.970 (0.936, 0.993) |
| Virchow2 | 0.996 (0.988, 1.000) | **1.000 (1.000, 1.000)** | 1.000 (1.000, 1.000) | 0.986 (0.966, 1.000) | 0.984 (0.959, 1.000) |
| CRISP | **0.999 (0.996, 1.000)** | **1.000 (1.000, 1.000)** | **1.000 (1.000, 1.000)** | **0.993 (0.980, 1.000)** | **0.992 (0.975, 1.000)** |
| ZSH | CHIEF | 0.903 (0.854, 0.953) | 0.630 (0.473, 0.765) | 0.457 (0.311, 0.605) | 0.824 (0.767, 0.875) | 0.869 (0.823, 0.912) |
| CONCH | 0.935 (0.891, 0.978) | 0.870 (0.767, 0.960) | 0.761 (0.635, 0.882) | 0.920 (0.875, 0.960) | 0.946 (0.913, 0.973) |
| UNI | 0.950 (0.907, 0.993) | **0.935 (0.857, 1.000)** | 0.826 (0.712, 0.927) | 0.915 (0.875, 0.955) | 0.940 (0.908, 0.967) |
| Virchow | 0.893 (0.846, 0.941) | 0.543 (0.394, 0.696) | 0.370 (0.231, 0.508) | 0.847 (0.790, 0.898) | 0.890 (0.849, 0.927) |
| Virchow2 | 0.962 (0.925, 0.998) | **0.935 (0.860, 1.000)** | 0.913 (0.826, 0.981) | 0.949 (0.915, 0.977) | 0.965 (0.941, 0.985) |
| CRISP | **0.967 (0.932, 1.000)** | **0.935 (0.848, 1.000)** | **0.935 (0.863, 1.000)** | **0.960 (0.926, 0.983)** | **0.973 (0.949, 0.992)** |
| NFH | CHIEF | 0.946 (0.916, 0.975) | 0.824 (0.759, 0.886) | 0.588 (0.504, 0.669) | 0.896 (0.858, 0.933) | 0.876 (0.829, 0.922) |
| CONCH | 0.967 (0.941, 0.993) | 0.934 (0.887, 0.971) | 0.853 (0.787, 0.906) | 0.946 (0.917, 0.971) | 0.935 (0.898, 0.967) |
| UNI | 0.961 (0.932, 0.989) | 0.897 (0.844, 0.944) | 0.772 (0.701, 0.839) | 0.938 (0.904, 0.967) | 0.925 (0.882, 0.958) |
| Virchow | 0.960 (0.933, 0.987) | 0.912 (0.863, 0.959) | 0.809 (0.743, 0.875) | 0.912 (0.875, 0.946) | 0.900 (0.851, 0.940) |
| Virchow2 | 0.975 (0.954, 0.995) | 0.934 (0.889, 0.972) | 0.919 (0.871, 0.961) | 0.942 (0.908, 0.967) | 0.935 (0.899, 0.966) |
| CRISP | **0.979 (0.958, 1.000)** | **0.963 (0.930, 0.993)** | **0.941 (0.897, 0.977)** | **0.958 (0.933, 0.983)** | **0.953 (0.922, 0.980)** |

Table S2.3. Performance of various models for the discrimination of benign and malignant lung lesions across different cohorts.

| Cohort | Model | AUROC | Spe (at 90% Sen) | Spe (at 95% Sen) | Accuracy | F1 |
| --- | --- | --- | --- | --- | --- | --- |
| SYCC | CHIEF | 0.933 (0.892, 0.974) | 0.716 (0.611, 0.806) | 0.543 (0.442, 0.653) | 0.887 (0.835, 0.940) | 0.851 (0.769, 0.917) |
| CONCH | 0.968 (0.937, 0.999) | 0.889 (0.820, 0.951) | 0.605 (0.494, 0.711) | 0.940 (0.895, 0.977) | 0.922 (0.860, 0.970) |
| UNI | 0.972 (0.942, 1.000) | 0.877 (0.805, 0.948) | 0.642 (0.537, 0.747) | 0.962 (0.932, 0.992) | 0.949 (0.897, 0.989) |
| Virchow | 0.968 (0.936, 1.000) | 0.963 (0.917, 1.000) | 0.642 (0.545, 0.747) | 0.947 (0.902, 0.978) | 0.932 (0.878, 0.979) |
| Virchow2 | 0.987 (0.973, 1.000) | **1.000 (1.000, 1.000)** | 0.802 (0.718, 0.885) | **0.970 (0.940, 0.992)** | **0.960 (0.920, 0.991)** |
| CRISP | **0.989 (0.975, 1.000)** | **1.000 (1.000, 1.000)** | **0.790 (0.699, 0.880)** | **0.970 (0.940, 0.992)** | **0.960 (0.913, 0.991)** |
| ZHDG | CHIEF | 0.852 (0.792, 0.912) | 0.506 (0.426, 0.581) | 0.256 (0.195, 0.324) | 0.861 (0.816, 0.906) | 0.735 (0.635, 0.815) |
| CONCH | 0.947 (0.912, 0.982) | 0.810 (0.747, 0.863) | 0.464 (0.389, 0.535) | 0.924 (0.888, 0.955) | 0.847 (0.768, 0.911) |
| UNI | 0.918 (0.868, 0.968) | 0.762 (0.696, 0.829) | 0.280 (0.216, 0.349) | 0.901 (0.861, 0.937) | 0.804 (0.720, 0.874) |
| Virchow | 0.884 (0.828, 0.939) | 0.804 (0.742, 0.861) | 0.143 (0.091, 0.200) | 0.857 (0.812, 0.901) | 0.758 (0.677, 0.837) |
| Virchow2 | 0.928 (0.885, 0.971) | 0.833 (0.775, 0.888) | **0.744 (0.673, 0.810)** | 0.901 (0.861, 0.937) | 0.817 (0.738, 0.889) |
| CRISP | **0.950 (0.910, 0.990)** | **0.929 (0.885, 0.966)** | 0.298 (0.233, 0.366) | **0.928 (0.892, 0.960)** | **0.867 (0.796, 0.923)** |
| NFH | CHIEF | 0.906 (0.866, 0.947) | 0.590 (0.495, 0.687) | 0.410 (0.321, 0.500) | 0.847 (0.794, 0.895) | 0.840 (0.784, 0.892) |
| CONCH | 0.975 (0.954, 0.995) | 0.950 (0.902, 0.989) | 0.950 (0.901, 0.989) | 0.957 (0.928, 0.981) | 0.959 (0.931, 0.982) |
| UNI | 0.979 (0.962, 0.997) | 0.980 (0.949, 1.000) | 0.900 (0.837, 0.954) | 0.952 (0.923, 0.981) | 0.953 (0.923, 0.978) |
| Virchow | 0.942 (0.910, 0.974) | 0.860 (0.792, 0.923) | 0.700 (0.610, 0.788) | 0.890 (0.842, 0.928) | 0.893 (0.845, 0.933) |
| Virchow2 | 0.987 (0.977, 0.998) | **0.980 (0.949, 1.000)** | 0.910 (0.851, 0.962) | 0.957 (0.928, 0.981) | 0.958 (0.928, 0.985) |
| CRISP | **0.989 (0.978, 1.000)** | 0.970 (0.932, 1.000) | **0.970 (0.929, 1.000)** | **0.967 (0.943, 0.990)** | **0.968 (0.942, 0.991)** |

Table S2.4. Performance of various models for the discrimination of benign and malignant breast lesions across different cohorts.

| Cohort | Model | AUROC | Spe (at 90% Sen) | Spe (at 95% Sen) | Accuracy | F1 |
| --- | --- | --- | --- | --- | --- | --- |
| SYCC | CHIEF | 0.911 (0.859, 0.962) | 0.609 (0.505, 0.709) | 0.126 (0.064, 0.202) | 0.877 (0.822, 0.926) | 0.853 (0.785, 0.912) |
| CONCH | 0.921 (0.877, 0.965) | 0.552 (0.448, 0.652) | 0.356 (0.256, 0.467) | 0.896 (0.847, 0.939) | 0.878 (0.817, 0.932) |
| UNI | 0.922 (0.875, 0.968) | 0.644 (0.541, 0.744) | 0.241 (0.154, 0.333) | **0.902 (0.853, 0.945)** | **0.884 (0.821, 0.936)** |
| Virchow | 0.914 (0.866, 0.962) | 0.632 (0.527, 0.735) | 0.310 (0.215, 0.405) | 0.877 (0.822, 0.926) | 0.861 (0.795, 0.915) |
| Virchow2 | 0.916 (0.874, 0.958) | 0.621 (0.520, 0.719) | 0.448 (0.344, 0.557) | 0.871 (0.822, 0.920) | 0.844 (0.773, 0.905) |
| CRISP | **0.933 (0.896, 0.969)** | **0.690 (0.593, 0.775)** | **0.494 (0.391, 0.600)** | 0.890 (0.840, 0.933) | 0.870 (0.806, 0.924) |
| ZSH | CHIEF | 0.907 (0.862, 0.952) | 0.558 (0.465, 0.661) | 0.308 (0.223, 0.396) | 0.871 (0.822, 0.919) | 0.836 (0.766, 0.895) |
| CONCH | 0.936 (0.897, 0.975) | 0.769 (0.680, 0.847) | 0.404 (0.312, 0.495) | 0.892 (0.849, 0.935) | 0.873 (0.820, 0.925) |
| UNI | 0.930 (0.888, 0.971) | 0.702 (0.617, 0.791) | 0.413 (0.325, 0.509) | 0.909 (0.866, 0.946) | 0.889 (0.835, 0.942) |
| Virchow | 0.917 (0.874, 0.959) | 0.702 (0.618, 0.786) | 0.375 (0.287, 0.465) | 0.860 (0.806, 0.909) | 0.845 (0.778, 0.900) |
| Virchow2 | 0.925 (0.878, 0.971) | 0.740 (0.657, 0.815) | 0.183 (0.115, 0.266) | 0.914 (0.871, 0.952) | 0.892 (0.832, 0.941) |
| CRISP | **0.952 (0.919, 0.985)** | **0.837 (0.755, 0.909)** | **0.519 (0.419, 0.611)** | **0.919 (0.882, 0.952)** | **0.902 (0.853, 0.945)** |
| NFH | CHIEF | 0.955 (0.917, 0.993) | 0.845 (0.786, 0.898) | 0.716 (0.646, 0.785) | 0.935 (0.903, 0.963) | 0.883 (0.819, 0.940) |
| CONCH | 0.962 (0.922, 1.000) | **0.955 (0.920, 0.986)** | 0.477 (0.399, 0.561) | **0.949 (0.917, 0.977)** | **0.913 (0.857, 0.961)** |
| UNI | 0.960 (0.924, 0.996) | 0.923 (0.878, 0.961) | 0.574 (0.500, 0.648) | 0.944 (0.912, 0.972) | 0.902 (0.842, 0.950) |
| Virchow | 0.957 (0.924, 0.990) | 0.858 (0.800, 0.912) | 0.535 (0.459, 0.615) | 0.935 (0.903, 0.968) | 0.879 (0.807, 0.937) |
| Virchow2 | 0.949 (0.911, 0.988) | 0.806 (0.748, 0.864) | 0.665 (0.589, 0.739) | 0.903 (0.866, 0.940) | 0.837 (0.760, 0.901) |
| CRISP | **0.970 (0.943, 0.997)** | 0.929 (0.887, 0.966) | **0.716 (0.642, 0.785)** | 0.931 (0.898, 0.958) | 0.884 (0.817, 0.937) |

Table S2.5. Performance of various models for the discrimination of benign and malignant thyroid lesions across different cohorts.

| Cohort | Model | AUROC | Spe (at 90% Sen) | Spe (at 95% Sen) | Accuracy | F1 |
| --- | --- | --- | --- | --- | --- | --- |
| SYCC | CHIEF | 0.930 (0.882, 0.979) | 0.628 (0.524, 0.732) | 0.410 (0.291, 0.521) | 0.893 (0.840, 0.947) | 0.868 (0.791, 0.933) |
| CONCH | 0.975 (0.948, 1.000) | 0.910 (0.846, 0.971) | 0.744 (0.654, 0.840) | 0.947 (0.908, 0.977) | 0.932 (0.876, 0.976) |
| UNI | 0.971 (0.934, 1.000) | 0.949 (0.900, 0.988) | 0.795 (0.695, 0.875) | 0.947 (0.901, 0.977) | 0.932 (0.875, 0.975) |
| Virchow | 0.992 (0.982, 1.000) | 0.962 (0.910, 1.000) | 0.885 (0.811, 0.949) | 0.954 (0.916, 0.985) | 0.941 (0.889, 0.982) |
| Virchow2 | 0.991 (0.979, 1.000) | 0.987 (0.959, 1.000) | 0.885 (0.813, 0.950) | **0.962 (0.924, 0.992)** | 0.952 (0.911, 0.990) |
| CRISP | **0.996 (0.991, 1.000)** | **1.000 (1.000, 1.000)** | **0.949 (0.899, 0.988)** | **0.962 (0.924, 0.992)** | **0.954 (0.906, 0.990)** |
| ZHG | CHIEF | 0.963 (0.932, 0.993) | 0.871 (0.802, 0.938) | 0.634 (0.531, 0.733) | 0.888 (0.832, 0.936) | 0.816 (0.716, 0.896) |
| CONCH | 0.920 (0.872, 0.968) | 0.731 (0.634, 0.818) | 0.656 (0.558, 0.744) | 0.888 (0.832, 0.944) | 0.781 (0.650, 0.886) |
| UNI | 0.914 (0.848, 0.979) | 0.559 (0.456, 0.659) | 0.312 (0.219, 0.409) | 0.888 (0.832, 0.936) | 0.800 (0.690, 0.896) |
| Virchow | 0.960 (0.931, 0.990) | 0.903 (0.837, 0.957) | **0.882 (0.816, 0.943)** | 0.912 (0.856, 0.960) | 0.853 (0.756, 0.928) |
| Virchow2 | 0.950 (0.905, 0.994) | 0.806 (0.724, 0.885) | 0.473 (0.376, 0.571) | **0.944 (0.904, 0.984)** | **0.881 (0.780, 0.958)** |
| CRISP | **0.977 (0.955, 0.999)** | **0.914 (0.851, 0.967)** | 0.753 (0.660, 0.835) | 0.920 (0.872, 0.960) | 0.857 (0.758, 0.938) |
| NFH | CHIEF | 0.869 (0.784, 0.954) | 0.241 (0.146, 0.346) | 0.013 (0.000, 0.041) | 0.880 (0.816, 0.936) | 0.835 (0.744, 0.911) |
| CONCH | 0.928 (0.875, 0.981) | 0.823 (0.735, 0.903) | 0.684 (0.575, 0.781) | 0.872 (0.808, 0.928) | 0.840 (0.755, 0.906) |
| UNI | 0.954 (0.919, 0.990) | 0.785 (0.694, 0.868) | 0.646 (0.540, 0.743) | 0.912 (0.856, 0.952) | 0.876 (0.795, 0.941) |
| Virchow | 0.942 (0.895, 0.989) | **0.911 (0.843, 0.965)** | **0.835 (0.756, 0.913)** | **0.920 (0.872, 0.960)** | **0.896 (0.823, 0.953)** |
| Virchow2 | 0.936 (0.890, 0.982) | 0.785 (0.688, 0.870) | 0.481 (0.373, 0.586) | 0.888 (0.832, 0.944) | 0.848 (0.761, 0.914) |
| CRISP | **0.965 (0.938, 0.992)** | 0.772 (0.677, 0.863) | 0.722 (0.613, 0.813) | 0.912 (0.856, 0.960) | 0.882 (0.810, 0.943) |

Table S2.6. Performance of various models for the discrimination of benign and malignant head and neck lesions across different cohorts.

| Cohort | Model | AUROC | Spe (at 90% Sen) | Spe (at 95% Sen) | Accuracy | F1 |
| --- | --- | --- | --- | --- | --- | --- |
| SYCC | CHIEF | 0.961 (0.930, 0.992) | 0.902 (0.809, 0.979) | 0.902 (0.805, 0.979) | 0.945 (0.909, 0.976) | 0.961 (0.933, 0.985) |
| CONCH | 0.987 (0.973, 1.000) | 0.961 (0.896, 1.000) | 0.941 (0.870, 1.000) | 0.964 (0.933, 0.988) | 0.974 (0.950, 0.991) |
| UNI | 0.996 (0.991, 1.000) | 0.980 (0.935, 1.000) | 0.961 (0.889, 1.000) | 0.964 (0.933, 0.988) | 0.973 (0.948, 0.991) |
| Virchow | 0.992 (0.983, 1.000) | **1.000 (1.000, 1.000)** | 0.922 (0.839, 0.982) | 0.952 (0.915, 0.982) | 0.964 (0.936, 0.986) |
| Virchow2 | 0.998 (0.995, 1.000) | **1.000 (1.000, 1.000)** | **1.000 (1.000, 1.000)** | 0.976 (0.952, 0.994) | 0.982 (0.962, 0.996) |
| CRISP | **1.000 (0.999, 1.000)** | **1.000 (1.000, 1.000)** | **1.000 (1.000, 1.000)** | **0.994 (0.982, 1.000)** | **0.996 (0.986, 1.000)** |
| ZSGZ | CHIEF | 0.840 (0.722, 0.958) | 0.083 (0.000, 0.286) | 0.083 (0.000, 0.278) | 0.755 (0.633, 0.878) | 0.812 (0.700, 0.909) |
| CONCH | 0.948 (0.880, 1.000) | 0.750 (0.500, 1.000) | 0.667 (0.400, 0.917) | 0.898 (0.816, 0.980) | 0.930 (0.853, 0.986) |
| UNI | 0.921 (0.837, 1.000) | 0.750 (0.500, 1.000) | 0.500 (0.222, 0.786) | 0.898 (0.816, 0.980) | 0.933 (0.870, 0.986) |
| Virchow | 0.872 (0.774, 0.969) | 0.417 (0.133, 0.727) | 0.250 (0.000, 0.501) | 0.755 (0.633, 0.878) | 0.806 (0.679, 0.899) |
| Virchow2 | 0.908 (0.793, 1.000) | 0.667 (0.400, 0.923) | 0.500 (0.200, 0.800) | 0.857 (0.755, 0.939) | 0.899 (0.808, 0.971) |
| CRISP | **0.984 (0.952, 1.000)** | **0.917 (0.714, 1.000)** | **0.917 (0.714, 1.000)** | **0.980 (0.939, 1.000)** | **0.987 (0.955, 1.000)** |
| NFH | CHIEF | 0.943 (0.897, 0.989) | 0.860 (0.750, 0.956) | 0.860 (0.738, 0.953) | 0.969 (0.952, 0.983) | 0.983 (0.974, 0.991) |
| CONCH | 0.917 (0.865, 0.969) | 0.837 (0.714, 0.943) | 0.721 (0.583, 0.854) | 0.929 (0.905, 0.952) | 0.960 (0.946, 0.974) |
| UNI | 0.945 (0.899, 0.992) | 0.907 (0.810, 0.979) | 0.860 (0.742, 0.955) | 0.932 (0.909, 0.954) | 0.961 (0.948, 0.974) |
| Virchow | 0.941 (0.916, 0.965) | 0.791 (0.657, 0.912) | 0.605 (0.465, 0.745) | 0.817 (0.784, 0.849) | 0.889 (0.866, 0.910) |
| Virchow2 | 0.964 (0.932, 0.997) | **0.907 (0.806, 0.982)** | 0.884 (0.780, 0.971) | 0.977 (0.963, 0.990) | 0.987 (0.980, 0.994) |
| CRISP | **0.967 (0.934, 1.000)** | **0.907 (0.811, 0.977)** | **0.907 (0.814, 0.979)** | **0.983 (0.971, 0.994)** | **0.991 (0.984, 0.997)** |

Table S2.7. Performance of various models for the discrimination of benign and malignant brain lesions across different cohorts.

| Cohort | Model | AUROC | Spe (at 90% Sen) | Spe (at 95% Sen) | Accuracy | F1 |
| --- | --- | --- | --- | --- | --- | --- |
| SYCC | CHIEF | 0.954 (0.909, 0.998) | 0.887 (0.815, 0.951) | 0.312 (0.217, 0.420) | 0.933 (0.888, 0.970) | 0.916 (0.855, 0.964) |
| CONCH | 0.959 (0.916, 1.000) | **0.963 (0.918, 1.000)** | 0.350 (0.247, 0.451) | 0.948 (0.910, 0.985) | 0.936 (0.884, 0.977) |
| UNI | 0.973 (0.936, 1.000) | **0.963 (0.919, 1.000)** | 0.650 (0.542, 0.750) | **0.963 (0.925, 0.993)** | **0.951 (0.905, 0.990)** |
| Virchow | 0.959 (0.919, 1.000) | 0.950 (0.899, 0.989) | 0.525 (0.412, 0.634) | 0.940 (0.896, 0.978) | 0.926 (0.870, 0.972) |
| Virchow2 | 0.969 (0.933, 1.000) | 0.950 (0.897, 0.989) | 0.713 (0.609, 0.800) | 0.940 (0.896, 0.978) | 0.927 (0.871, 0.971) |
| CRISP | **0.979 (0.960, 0.999)** | 0.912 (0.841, 0.966) | **0.775 (0.679, 0.865)** | 0.948 (0.910, 0.978) | 0.931 (0.874, 0.978) |
| ZSH | CHIEF | 0.892 (0.835, 0.948) | 0.628 (0.548, 0.715) | 0.535 (0.445, 0.620) | 0.795 (0.731, 0.854) | 0.673 (0.555, 0.768) |
| CONCH | 0.949 (0.915, 0.982) | 0.822 (0.750, 0.884) | 0.744 (0.667, 0.817) | 0.848 (0.789, 0.901) | 0.750 (0.652, 0.835) |
| UNI | 0.936 (0.901, 0.971) | 0.822 (0.759, 0.883) | 0.798 (0.730, 0.866) | 0.842 (0.789, 0.895) | 0.752 (0.659, 0.831) |
| Virchow | 0.915 (0.874, 0.957) | 0.760 (0.685, 0.832) | 0.698 (0.620, 0.775) | 0.830 (0.766, 0.883) | 0.724 (0.612, 0.814) |
| Virchow2 | 0.943 (0.903, 0.984) | 0.837 (0.768, 0.898) | 0.760 (0.686, 0.829) | 0.848 (0.789, 0.901) | 0.755 (0.653, 0.839) |
| CRISP | **0.974 (0.952, 0.995)** | **0.891 (0.837, 0.940)** | **0.837 (0.769, 0.899)** | **0.942 (0.906, 0.971)** | **0.881 (0.800, 0.944)** |
| NFH | CHIEF | 0.963 (0.933, 0.992) | 0.873 (0.816, 0.923) | 0.675 (0.599, 0.745) | 0.911 (0.868, 0.947) | 0.779 (0.667, 0.876) |
| CONCH | 0.983 (0.968, 0.999) | 0.943 (0.903, 0.975) | **0.815 (0.755, 0.873)** | 0.942 (0.900, 0.974) | 0.849 (0.750, 0.930) |
| UNI | 0.981 (0.961, 1.000) | 0.949 (0.911, 0.981) | 0.720 (0.652, 0.789) | 0.947 (0.911, 0.979) | 0.861 (0.767, 0.939) |
| Virchow | 0.976 (0.955, 0.998) | 0.924 (0.878, 0.963) | 0.732 (0.662, 0.797) | 0.926 (0.889, 0.963) | 0.816 (0.708, 0.901) |
| Virchow2 | 0.972 (0.940, 1.000) | 0.930 (0.889, 0.968) | 0.497 (0.422, 0.578) | 0.963 (0.937, 0.984) | 0.896 (0.806, 0.964) |
| CRISP | **0.984 (0.967, 1.000)** | **0.975 (0.948, 0.994)** | 0.790 (0.725, 0.851) | **0.968 (0.942, 0.989)** | **0.912 (0.830, 0.974)** |

Table S2.8. Performance of various models for the discrimination of benign and malignant ovary lesions across different cohorts.

| Cohort | Model | AUROC | Spe (at 90% Sen) | Spe (at 95% Sen) | Accuracy | F1 |
| --- | --- | --- | --- | --- | --- | --- |
| SYCC | CHIEF | 0.877 (0.818, 0.937) | 0.397 (0.273, 0.519) | 0.172 (0.078, 0.271) | 0.835 (0.770, 0.892) | 0.837 (0.765, 0.899) |
| CONCH | 0.910 (0.855, 0.966) | 0.466 (0.340, 0.600) | 0.103 (0.032, 0.189) | 0.899 (0.849, 0.942) | 0.905 (0.848, 0.950) |
| UNI | 0.923 (0.874, 0.973) | 0.517 (0.392, 0.648) | 0.259 (0.149, 0.380) | 0.906 (0.856, 0.950) | 0.913 (0.865, 0.957) |
| Virchow | 0.931 (0.885, 0.976) | 0.690 (0.569, 0.811) | 0.328 (0.208, 0.443) | 0.906 (0.856, 0.957) | 0.913 (0.859, 0.955) |
| Virchow2 | **0.938 (0.895, 0.980)** | 0.638 (0.508, 0.763) | **0.414 (0.288, 0.545)** | **0.921 (0.871, 0.964)** | **0.927 (0.881, 0.967)** |
| CRISP | **0.938 (0.898, 0.979)** | **0.741 (0.623, 0.850)** | 0.310 (0.194, 0.426) | 0.899 (0.842, 0.942) | 0.907 (0.853, 0.951) |
| ZSH | CHIEF | 0.772 (0.657, 0.887) | 0.214 (0.095, 0.343) | 0.143 (0.045, 0.250) | 0.786 (0.700, 0.886) | 0.651 (0.471, 0.800) |
| CONCH | 0.918 (0.853, 0.984) | 0.643 (0.500, 0.780) | **0.357 (0.205, 0.500)** | 0.871 (0.786, 0.943) | 0.836 (0.714, 0.933) |
| UNI | 0.923 (0.847, 0.999) | 0.476 (0.333, 0.625) | 0.119 (0.025, 0.225) | 0.914 (0.843, 0.971) | 0.885 (0.789, 0.964) |
| Virchow | 0.874 (0.782, 0.966) | 0.381 (0.225, 0.524) | 0.238 (0.106, 0.372) | 0.900 (0.829, 0.957) | 0.863 (0.756, 0.945) |
| Virchow2 | 0.918 (0.844, 0.993) | 0.524 (0.375, 0.675) | 0.143 (0.047, 0.243) | 0.900 (0.829, 0.971) | 0.863 (0.739, 0.952) |
| CRISP | **0.957 (0.895, 1.000)** | **0.714 (0.564, 0.837)** | 0.167 (0.059, 0.286) | **0.943 (0.886, 0.986)** | **0.929 (0.847, 0.984)** |
| NFH | CHIEF | 0.567 (0.455, 0.680) | 0.000 (0.000, 0.000) | 0.000 (0.000, 0.000) | 0.577 (0.496, 0.657) | 0.420 (0.289, 0.537) |
| CONCH | 0.798 (0.709, 0.888) | 0.257 (0.177, 0.343) | 0.099 (0.046, 0.162) | 0.781 (0.715, 0.847) | 0.634 (0.492, 0.756) |
| UNI | 0.870 (0.788, 0.951) | 0.307 (0.221, 0.404) | 0.149 (0.082, 0.222) | **0.898 (0.847, 0.942)** | 0.781 (0.655, 0.875) |
| Virchow | 0.820 (0.735, 0.906) | 0.356 (0.274, 0.452) | 0.099 (0.048, 0.160) | 0.832 (0.766, 0.891) | 0.667 (0.526, 0.789) |
| Virchow2 | 0.905 (0.841, 0.968) | 0.752 (0.663, 0.833) | 0.188 (0.116, 0.264) | **0.898 (0.847, 0.949)** | **0.821 (0.712, 0.907)** |
| CRISP | **0.919 (0.867, 0.972)** | **0.762 (0.676, 0.846)** | **0.287 (0.196, 0.377)** | 0.883 (0.825, 0.934) | 0.805 (0.700, 0.894) |

Table S2.9. Performance of various models for the discrimination of benign and malignant abdomen lesions across different cohorts.

| Tasks | Data Split | | | | |
| --- | --- | --- | --- | --- | --- |
| Internal-Train | Internal-Validation | Internal-Test | External-Test1  (NFH) | External-Test2  (ZSH) |
| PCNSLD | 434 | 179 | 328 | 461 |  |
| CNSLC | 434 | 179 | 328 | 461 |  |
| OCCGS | 253 | 112 | 134 | 166 (NFH) + 169 (ZSH) |  |
| OCFGS | 253 | 112 | 134 | 166 (NFH) + 169 (ZSH) |  |
| TNDD | 290 | 88 | 158 |  | 192 |
| PGD | 302 | 96 | 172 | 495 |  |
| SLMD | 262 | 87 | 150 | 233 | 196 |
| CLMD | 197 | 75 | 93 | 228 |  |
| BSMA | 216 | 118 | 150 | 208 | 195 |

Supplementary Table S3.1. Dataset composition across key intraoperative decision-making tasks.

| Model | AUROC | Spe (at 90% Sen) | Spe (at 95% Sen) | Accuracy | F1 |
| --- | --- | --- | --- | --- | --- |
| CHIEF | 0.890±0.105 | 0.661±0.247 | 0.501±0.317 | 0.846±0.144 | 0.697±0.195 |
| CONCH | 0.935±0.065 | 0.757±0.214 | 0.580±0.214 | 0.903±0.118 | 0.799±0.150 |
| UNI | 0.932±0.069 | 0.722±0.266 | 0.603±0.274 | 0.890±0.134 | 0.782±0.140 |
| Virchow | 0.949±0.037 | 0.791±0.173 | 0.607±0.302 | 0.924±0.059 | 0.791±0.118 |
| Virchow2 | 0.960±0.033 | 0.795±0.214 | 0.634±0.249 | 0.936±0.047 | 0.829±0.097 |
| CRISP | **0.979±0.028** | **0.906±0.121** | **0.823±0.156** | **0.951±0.044** | **0.863±0.126** |

Table S3.2. Average performance of various models across 12 clinical binary classification tasks.

| Model | Macro AUC | Balanced Acc | Weighted F1 |
| --- | --- | --- | --- |
| CHIEF | 0.908±0.032 | 0.562±0.135 | 0.831±0.061 |
| CONCH | 0.937±0.022 | 0.724±0.093 | 0.855±0.055 |
| UNI | 0.929±0.043 | 0.730±0.159 | 0.869±0.070 |
| Virchow | 0.936±0.030 | 0.667±0.145 | 0.844±0.077 |
| Virchow2 | 0.945±0.032 | 0.740±0.155 | 0.856±0.092 |
| CRISP | **0.963±0.017** | **0.781±0.138** | **0.899±0.048** |

Table S3.3. Average performance of various models across 8 clinical multi-class classification tasks.

| Cohort | Model | AUROC | Spe (at 90% Sen) | Spe (at 95% Sen) | Accuracy | F1 |
| --- | --- | --- | --- | --- | --- | --- |
| SYCC | CHIEF | 0.980 (0.957, 1.000) | 0.933 (0.905, 0.961) | 0.891 (0.854, 0.925) | 0.933 (0.905, 0.957) | 0.792 (0.701, 0.869) |
| CONCH | 0.995 (0.988, 1.000) | **1.000 (1.000, 1.000)** | 0.926 (0.892, 0.956) | **0.991 (0.979, 1.000)** | **0.965 (0.918, 1.000)** |
| UNI | 0.991 (0.983, 0.999) | 0.947 (0.921, 0.971) | 0.944 (0.915, 0.969) | 0.948 (0.924, 0.970) | 0.835 (0.745, 0.904) |
| Virchow | 0.991 (0.980, 1.000) | 0.993 (0.982, 1.000) | 0.898 (0.863, 0.931) | 0.985 (0.970, 0.997) | 0.943 (0.877, 0.987) |
| Virchow2 | 0.992 (0.981, 1.000) | 0.989 (0.976, 1.000) | 0.933 (0.903, 0.961) | 0.973 (0.954, 0.988) | 0.903 (0.833, 0.960) |
| CRISP | **0.998 (0.995, 1.000)** | 0.982 (0.966, 0.996) | **0.982 (0.965, 0.996)** | 0.982 (0.966, 0.994) | 0.935 (0.874, 0.980) |
| NFH | CHIEF | 0.970 (0.947, 0.994) | 0.852 (0.821, 0.883) | 0.813 (0.779, 0.848) | 0.822 (0.787, 0.857) | 0.349 (0.243, 0.454) |
| CONCH | 0.982 (0.954, 1.000) | **0.938 (0.914, 0.959)** | 0.692 (0.649, 0.734) | **0.983 (0.970, 0.993)** | **0.833 (0.698, 0.933)** |
| UNI | 0.951 (0.906, 0.996) | 0.661 (0.617, 0.705) | 0.658 (0.616, 0.702) | 0.959 (0.939, 0.976) | 0.667 (0.500, 0.800) |
| Virchow | 0.984 (0.969, 0.998) | 0.916 (0.888, 0.939) | 0.870 (0.837, 0.898) | 0.967 (0.950, 0.983) | 0.727 (0.578, 0.846) |
| Virchow2 | 0.981 (0.961, 1.000) | 0.854 (0.819, 0.886) | 0.829 (0.793, 0.865) | 0.944 (0.922, 0.963) | 0.606 (0.449, 0.736) |
| CRISP | **0.987 (0.975, 0.999)** | **0.938 (0.916, 0.959)** | **0.895 (0.867, 0.922)** | 0.900 (0.874, 0.926) | 0.489 (0.346, 0.612) |

Table S3.4. Performance of various models for the PCNSLD task across different cohorts.

| Cohort | Model | Macro AUC | Balanced ACC | Weighted F1 | Class-specific AUCs | | | | | |
| --- | --- | --- | --- | --- | --- | --- | --- | --- | --- | --- |
| Glioma | MB | Inflammation | CN | MC | Lymphoma |
| SYCC | CHIEF | 0.947 | 0.608 | 0.888 | 0.976 | 0.977 | 0.887 | 0.854 | 0.993 | 0.993 |
| CONCH | 0.966 | 0.699 | 0.911 | **0.991** | 0.98 | 0.972 | 0.862 | 0.994 | 0.996 |
| UNI | 0.970 | 0.666 | 0.905 | 0.987 | 0.986 | 0.929 | **0.926** | 0.993 | **0.999** |
| Virchow | 0.964 | 0.622 | 0.927 | **0.991** | 0.985 | 0.976 | 0.842 | **0.999** | 0.993 |
| Virchow2 | 0.972 | **0.746** | 0.924 | 0.989 | 0.994 | 0.975 | 0.883 | 0.998 | 0.994 |
| CRISP | **0.981** | 0.733 | **0.935** | **0.991** | **0.997** | **0.978** | 0.923 | 0.996 | 0.998 |
| NFH | CHIEF | 0.857 | 0.471 | 0.813 | 0.918 | **0.963** | 0.768 | 0.572 | 0.967 | 0.957 |
| CONCH | 0.924 | **0.555** | 0.761 | 0.934 | 0.926 | 0.923 | 0.775 | **0.997** | **0.986** |
| UNI | 0.834 | 0.385 | 0.744 | **0.94** | 0.843 | 0.795 | 0.561 | 0.942 | 0.924 |
| Virchow | 0.895 | 0.394 | 0.775 | 0.911 | 0.937 | 0.908 | 0.651 | 0.989 | 0.972 |
| Virchow2 | 0.904 | 0.417 | 0.733 | 0.919 | 0.94 | 0.931 | 0.658 | 0.984 | 0.991 |
| CRISP | **0.942** | 0.470 | **0.816** | 0.933 | 0.959 | **0.97** | **0.815** | 0.994 | 0.984 |

Table S3.5. Performance of various models for the CNSLC task across different cohorts.

| Cohort | Model | Macro AUC | Balanced ACC | Weighted F1 | Class-specific AUCs | | |
| --- | --- | --- | --- | --- | --- | --- | --- |
| Benign | Primary | Metastatic |
| SYCC | CHIEF | 0.941 | 0.768 | 0.882 | 0.964 | 0.958 | 0.9 |
| CONCH | 0.961 | 0.836 | 0.914 | 0.971 | 0.954 | 0.959 |
| UNI | 0.961 | 0.877 | 0.924 | 0.962 | 0.967 | 0.953 |
| Virchow | 0.975 | 0.766 | 0.886 | **0.979** | 0.971 | **0.975** |
| Virchow2 | 0.972 | **0.921** | **0.947** | 0.977 | **0.987** | 0.953 |
| CRISP | **0.976** | 0.908 | 0.925 | 0.978 | 0.982 | 0.968 |
| NFH | CHIEF | 0.904 | 0.504 | 0.893 | 0.934 | 0.932 | 0.847 |
| CONCH | 0.941 | 0.786 | 0.877 | 0.955 | 0.941 | 0.929 |
| UNI | 0.949 | 0.850 | 0.926 | 0.933 | 0.921 | **0.994** |
| Virchow | 0.953 | 0.667 | 0.901 | 0.953 | 0.947 | 0.96 |
| Virchow2 | 0.961 | 0.688 | 0.892 | 0.953 | 0.948 | 0.982 |
| CRISP | **0.968** | **0.858** | **0.930** | **0.974** | **0.963** | 0.968 |

Table S3.6. Performance of various models for the OCCGS task across different cohorts.

| Cohort | Model | Macro AUC | Balanced ACC | Weighted F1 | Class-specific AUCs | | | | |
| --- | --- | --- | --- | --- | --- | --- | --- | --- | --- |
| Benign | SC | CCC | EA | Metastatic |
| SYCC | CHIEF | 0.934 | 0.592 | 0.820 | 0.964 | 0.953 | 0.936 | 0.919 | 0.901 |
| CONCH | 0.943 | 0.776 | 0.906 | 0.98 | 0.97 | 0.86 | 0.934 | 0.973 |
| UNI | 0.941 | 0.814 | 0.918 | 0.959 | 0.956 | 0.886 | 0.958 | 0.945 |
| Virchow | 0.951 | 0.750 | 0.905 | 0.966 | 0.958 | 0.893 | 0.956 | 0.983 |
| Virchow2 | 0.975 | **0.883** | **0.941** | **0.978** | **0.986** | 0.957 | **0.998** | 0.957 |
| CRISP | **0.985** | 0.850 | 0.933 | **0.978** | 0.975 | **0.99** | 0.993 | **0.987** |
| NFZS | CHIEF | 0.892 | 0.332 | 0.854 | 0.927 | 0.955 | 0.81 | 0.918 | 0.85 |
| CONCH | 0.933 | 0.622 | 0.832 | 0.941 | 0.977 | 0.914 | 0.895 | 0.935 |
| UNI | 0.906 | 0.676 | 0.899 | 0.91 | 0.907 | 0.848 | 0.89 | 0.973 |
| Virchow | 0.895 | 0.533 | 0.866 | 0.902 | 0.896 | 0.87 | 0.845 | 0.96 |
| Virchow2 | 0.947 | 0.708 | 0.888 | 0.964 | 0.949 | 0.903 | 0.925 | **0.992** |
| CRISP | **0.960** | **0.790** | **0.925** | **0.968** | **0.981** | **0.925** | **0.946** | 0.979 |

Table S3.7. Performance of various models for the OCCFS task across different cohorts.

| Cohort | Model | Macro AUC | Balanced ACC | Weighted F1 | Class-specific AUCs | | |
| --- | --- | --- | --- | --- | --- | --- | --- |
| OB | FL | PTC |
| SYCC | CHIEF | 0.914 | 0.688 | 0.777 | 0.894 | 0.897 | 0.952 |
| CONCH | 0.934 | 0.770 | 0.821 | 0.925 | 0.891 | 0.986 |
| UNI | 0.943 | 0.790 | 0.785 | 0.925 | **0.927** | 0.978 |
| Virchow | 0.925 | 0.792 | 0.719 | 0.899 | 0.924 | 0.953 |
| Virchow2 | 0.935 | **0.820** | 0.806 | 0.916 | 0.919 | 0.97 |
| CRISP | **0.951** | 0.773 | **0.830** | **0.938** | **0.927** | **0.989** |
| NFH | CHIEF | 0.873 | 0.529 | 0.719 | 0.953 | 0.767 | 0.901 |
| CONCH | 0.895 | 0.744 | 0.820 | 0.938 | 0.847 | 0.902 |
| UNI | 0.925 | 0.786 | 0.849 | 0.926 | 0.936 | 0.913 |
| Virchow | 0.931 | 0.812 | 0.772 | 0.927 | **0.957** | 0.909 |
| Virchow2 | 0.893 | 0.739 | 0.719 | 0.881 | 0.865 | 0.933 |
| CRISP | **0.941** | **0.862** | **0.897** | **0.96** | 0.922 | **0.94** |

Table S3.8. Performance of various models for the TNDD task across different cohorts.

| Cohort | Model | AUROC | Spe (at 90% Sen) | Spe (at 95% Sen) | Accuracy | F1 |
| --- | --- | --- | --- | --- | --- | --- |
| SYCC | CHIEF | 0.793 (0.726, 0.860) | 0.612 (0.505, 0.707) | 0.388 (0.291, 0.484) | 0.744 (0.680, 0.814) | 0.756 (0.675, 0.822) |
| CONCH | 0.836 (0.778, 0.894) | 0.602 (0.495, 0.701) | 0.449 (0.347, 0.547) | 0.762 (0.698, 0.826) | 0.745 (0.658, 0.814) |
| UNI | 0.804 (0.741, 0.867) | 0.551 (0.455, 0.649) | 0.500 (0.404, 0.604) | 0.721 (0.657, 0.785) | 0.747 (0.677, 0.816) |
| Virchow | 0.904 (0.862, 0.946) | **0.673 (0.585, 0.761)** | **0.582 (0.490, 0.670)** | 0.802 (0.738, 0.860) | 0.795 (0.717, 0.854) |
| Virchow2 | 0.885 (0.838, 0.932) | 0.612 (0.510, 0.702) | 0.480 (0.376, 0.571) | 0.820 (0.762, 0.878) | 0.780 (0.698, 0.849) |
| CRISP | **0.905 (0.863, 0.947)** | **0.673 (0.577, 0.763)** | 0.551 (0.453, 0.652) | **0.831 (0.779, 0.884)** | **0.808 (0.732, 0.868)** |
| NFH | CHIEF | 0.628 (0.576, 0.679) | 0.413 (0.365, 0.459) | 0.364 (0.312, 0.412) | 0.489 (0.444, 0.531) | 0.407 (0.348, 0.467) |
| CONCH | 0.775 (0.728, 0.822) | 0.483 (0.433, 0.531) | 0.431 (0.385, 0.477) | 0.592 (0.547, 0.636) | 0.445 (0.381, 0.508) |
| UNI | 0.784 (0.735, 0.832) | 0.468 (0.419, 0.517) | 0.433 (0.384, 0.483) | 0.527 (0.485, 0.572) | 0.435 (0.378, 0.495) |
| Virchow | 0.871 (0.824, 0.917) | 0.592 (0.544, 0.641) | 0.240 (0.200, 0.283) | 0.826 (0.788, 0.857) | 0.629 (0.547, 0.700) |
| Virchow2 | 0.913 (0.879, 0.947) | 0.653 (0.606, 0.697) | 0.480 (0.435, 0.529) | 0.901 (0.875, 0.927) | 0.738 (0.663, 0.806) |
| CRISP | **0.944 (0.918, 0.971)** | **0.720 (0.676, 0.764)** | **0.559 (0.507, 0.612)** | **0.956 (0.937, 0.974)** | **0.872 (0.814, 0.919)** |

Table S3.9. Performance of various models for the PGD task across different cohorts.

| Cohort | Model | AUROC | Spe (at 90% Sen) | Spe (at 95% Sen) | Accuracy | F1 |
| --- | --- | --- | --- | --- | --- | --- |
| SYCC | CHIEF | 0.989 (0.975, 1.000) | 0.989 (0.962, 1.000) | 0.888 (0.819, 0.947) | 0.967 (0.933, 0.993) | 0.959 (0.920, 0.992) |
| CONCH | 0.991 (0.978, 1.000) | 0.989 (0.963, 1.000) | 0.978 (0.944, 1.000) | 0.973 (0.947, 0.993) | 0.967 (0.932, 0.993) |
| UNI | 0.994 (0.986, 1.000) | 0.989 (0.962, 1.000) | 0.989 (0.966, 1.000) | 0.980 (0.953, 1.000) | **0.976 (0.943, 1.000)** |
| Virchow | 0.990 (0.978, 1.000) | 0.978 (0.940, 1.000) | 0.944 (0.897, 0.988) | 0.960 (0.927, 0.987) | 0.950 (0.909, 0.984) |
| Virchow2 | 0.997 (0.991, 1.000) | **1.000 (1.000, 1.000)** | **0.989 (0.963, 1.000)** | **0.980 (0.953, 1.000)** | 0.975 (0.945, 1.000) |
| CRISP | **0.998 (0.994, 1.000)** | 0.989 (0.963, 1.000) | 0.978 (0.940, 1.000) | **0.980 (0.953, 1.000)** | **0.976 (0.945, 1.000)** |
| NFH | CHIEF | 0.866 (0.781, 0.951) | 0.308 (0.247, 0.371) | 0.111 (0.068, 0.158) | 0.931 (0.897, 0.961) | 0.758 (0.633, 0.865) |
| CONCH | 0.945 (0.897, 0.993) | 0.591 (0.522, 0.660) | 0.434 (0.364, 0.503) | 0.966 (0.940, 0.987) | 0.879 (0.780, 0.955) |
| UNI | 0.909 (0.836, 0.983) | 0.333 (0.268, 0.396) | 0.146 (0.096, 0.197) | 0.936 (0.901, 0.966) | 0.795 (0.686, 0.889) |
| Virchow | 0.916 (0.853, 0.979) | 0.455 (0.394, 0.526) | 0.288 (0.225, 0.354) | 0.940 (0.906, 0.970) | 0.800 (0.690, 0.895) |
| Virchow2 | 0.945 (0.885, 1.000) | 0.692 (0.631, 0.760) | 0.182 (0.134, 0.241) | **0.970 (0.944, 0.991)** | **0.901 (0.821, 0.962)** |
| CRISP | **0.969 (0.941, 0.998)** | **0.732 (0.671, 0.796)** | **0.687 (0.621, 0.748)** | 0.966 (0.940, 0.987) | 0.886 (0.793, 0.957) |
| ZSH | CHIEF | 0.971 (0.941, 1.000) | 0.870 (0.812, 0.924) | 0.675 (0.597, 0.743) | 0.969 (0.944, 0.990) | 0.923 (0.849, 0.977) |
| CONCH | 0.957 (0.906, 1.000) | 0.974 (0.947, 0.994) | 0.558 (0.480, 0.641) | 0.964 (0.934, 0.990) | 0.918 (0.846, 0.970) |
| UNI | 0.981 (0.958, 1.000) | **0.994 (0.980, 1.000)** | 0.675 (0.595, 0.747) | **0.980 (0.959, 0.995)** | 0.951 (0.892, 0.989) |
| Virchow | 0.968 (0.943, 0.993) | 0.935 (0.893, 0.973) | 0.721 (0.653, 0.790) | 0.954 (0.923, 0.980) | 0.894 (0.815, 0.958) |
| Virchow2 | 0.970 (0.940, 1.000) | 0.955 (0.919, 0.986) | 0.812 (0.746, 0.873) | 0.949 (0.918, 0.980) | 0.886 (0.812, 0.949) |
| CRISP | **0.986 (0.963, 1.000)** | **0.994 (0.980, 1.000)** | **0.890 (0.840, 0.932)** | **0.980 (0.959, 0.995)** | **0.952 (0.895, 0.989)** |

Table S3.10. Performance of various models for the SLMD task across different cohorts.

| Cohort | Model | AUROC | Spe (at 90% Sen) | Accuracy | F1 |
| --- | --- | --- | --- | --- | --- |
| SYCC | CHIEF | 0.965 (0.929, 1.000) | 0.900 (0.826, 0.958) | 0.914 (0.849, 0.968) | 0.846 (0.732, 0.939) |
| CONCH | 0.965 (0.913, 1.000) | **0.957 (0.908, 1.000)** | **0.957 (0.914, 0.989)** | **0.917 (0.818, 0.982)** |
| UNI | 0.948 (0.881, 1.000) | 0.929 (0.863, 0.986) | 0.935 (0.882, 0.978) | 0.880 (0.773, 0.962) |
| Virchow | 0.943 (0.861, 1.000) | 0.943 (0.881, 0.987) | 0.946 (0.903, 0.989) | 0.898 (0.791, 0.980) |
| Virchow2 | 0.968 (0.918, 1.000) | 0.914 (0.842, 0.973) | 0.925 (0.871, 0.978) | 0.863 (0.750, 0.947) |
| CRISP | **0.986 (0.966, 1.000)** | 0.943 (0.886, 0.987) | 0.946 (0.892, 0.989) | 0.898 (0.792, 0.978) |
| NFH | CHIEF | 0.914 (0.807, 1.000) | 0.288 (0.229, 0.344) | 0.969 (0.943, 0.991) | 0.741 (0.518, 0.903) |
| CONCH | 0.954 (0.882, 1.000) | 0.516 (0.450, 0.584) | 0.961 (0.934, 0.982) | 0.727 (0.533, 0.875) |
| UNI | 0.928 (0.813, 1.000) | 0.237 (0.185, 0.298) | 0.974 (0.952, 0.991) | 0.786 (0.592, 0.923) |
| Virchow | 0.971 (0.922, 1.000) | 0.674 (0.615, 0.739) | 0.978 (0.956, 0.996) | 0.828 (0.647, 0.957) |
| Virchow2 | 0.940 (0.827, 1.000) | 0.251 (0.192, 0.309) | 0.974 (0.952, 0.991) | 0.800 (0.600, 0.933) |
| CRISP | **0.998 (0.995, 1.000)** | **0.981 (0.959, 0.995)** | **0.982 (0.965, 0.996)** | **0.867 (0.714, 0.973)** |

Table S3.11. Performance of various models for the CLMD task across different cohorts.

| Cohort | Model | AUROC | Spe (at 90% Sen) | Spe (at 95% Sen) | Accuracy | F1 |
| --- | --- | --- | --- | --- | --- | --- |
| SYCC | CHIEF | 0.885 (0.821, 0.949) | 0.587 (0.504, 0.672) | 0.149 (0.090, 0.215) | 0.814 (0.750, 0.872) | 0.688 (0.568, 0.784) |
| CONCH | 0.960 (0.926, 0.994) | 0.860 (0.795, 0.917) | 0.504 (0.417, 0.597) | 0.865 (0.808, 0.917) | 0.764 (0.657, 0.854) |
| UNI | 0.962 (0.933, 0.992) | 0.860 (0.795, 0.923) | 0.669 (0.583, 0.750) | 0.878 (0.827, 0.923) | 0.776 (0.674, 0.865) |
| Virchow | 0.946 (0.907, 0.985) | 0.719 (0.637, 0.803) | 0.545 (0.458, 0.635) | 0.923 (0.878, 0.962) | 0.833 (0.719, 0.919) |
| Virchow2 | 0.978 (0.957, 0.998) | 0.876 (0.810, 0.932) | 0.736 (0.658, 0.811) | 0.891 (0.840, 0.936) | 0.800 (0.685, 0.889) |
| CRISP | **0.995 (0.989, 1.000)** | **0.983 (0.957, 1.000)** | **0.934 (0.885, 0.975)** | **0.949 (0.910, 0.981)** | **0.897 (0.822, 0.962)** |
| NFH | CHIEF | 0.813 (0.751, 0.876) | 0.656 (0.582, 0.727) | 0.489 (0.415, 0.556) | 0.697 (0.635, 0.760) | 0.462 (0.348, 0.569) |
| CONCH | 0.922 (0.880, 0.964) | 0.694 (0.627, 0.758) | 0.667 (0.604, 0.737) | 0.885 (0.837, 0.928) | 0.657 (0.517, 0.773) |
| UNI | 0.978 (0.961, 0.995) | 0.894 (0.844, 0.938) | 0.889 (0.840, 0.935) | 0.904 (0.861, 0.942) | 0.737 (0.610, 0.836) |
| Virchow | 0.956 (0.930, 0.983) | 0.872 (0.819, 0.918) | 0.861 (0.806, 0.914) | 0.880 (0.837, 0.923) | 0.691 (0.557, 0.796) |
| Virchow2 | 0.974 (0.936, 1.000) | 0.894 (0.849, 0.938) | 0.461 (0.392, 0.536) | **0.971 (0.947, 0.990)** | 0.897 (0.792, 0.966) |
| CRISP | **0.991 (0.979, 1.000)** | **0.972 (0.947, 0.994)** | **0.900 (0.855, 0.942)** | **0.971 (0.947, 0.990)** | **0.900 (0.807, 0.970)** |
| ZSH | CHIEF | 0.911 (0.830, 0.992) | 0.521 (0.446, 0.595) | 0.030 (0.006, 0.058) | 0.903 (0.862, 0.938) | 0.689 (0.545, 0.810) |
| CONCH | 0.935 (0.871, 0.999) | 0.485 (0.413, 0.553) | 0.325 (0.257, 0.395) | 0.933 (0.897, 0.964) | 0.772 (0.638, 0.884) |
| UNI | 0.954 (0.912, 0.997) | 0.799 (0.744, 0.855) | 0.491 (0.420, 0.569) | 0.944 (0.908, 0.974) | 0.800 (0.667, 0.906) |
| Virchow | 0.948 (0.911, 0.985) | 0.746 (0.677, 0.812) | 0.686 (0.613, 0.756) | 0.928 (0.892, 0.964) | 0.759 (0.640, 0.870) |
| Virchow2 | 0.974 (0.944, 1.000) | 0.846 (0.793, 0.898) | 0.645 (0.571, 0.714) | 0.938 (0.897, 0.969) | 0.800 (0.667, 0.900) |
| CRISP | **0.991 (0.980, 1.000)** | **0.964 (0.935, 0.994)** | **0.888 (0.834, 0.930)** | **0.964 (0.938, 0.990)** | **0.877 (0.772, 0.955)** |

Table S3.12. Performance of various models for the BSMA task across different cohorts.

| Organ | Annual incidence in the U.S. | Classification |
| --- | --- | --- |
| Breast | 319,750 | Common |
| Lung | 226,650 |
| Colorectum | 154,270 |
| H&N | 113,840 |
| Skin | 112,690 |
| Uterus | 69,120 |
| Pancreas | 67,440 |
| Thyroid | 44,020 |
| Liver | 42,240 |
| Brain | 24,820 | Rare |
| Ovary | 20,890 |
| Soft Tissue | 13,520 |
| Cervix | 13,360 |
| Bile Duct | 12,610 |
| Pleura | 6,030 |

Table S4.1. Definition of rare cancers and estimated annual incidence.

| Subset | Organ | Slides | PositiveCase |
| --- | --- | --- | --- |
| Train | Brain | 234 | 143 |
| Breast | 272 | 71 |
| H&N | 261 | 106 |
| Lung | 257 | 96 |
| Ovary | 253 | 111 |
| Thyroid | 296 | 125 |
| **Sum** | **1573** | **652** |
| Val | Brain | 108 | 63 |
| Breast | 97 | 35 |
| H&N | 87 | 30 |
| Lung | 110 | 43 |
| Ovary | 112 | 43 |
| Thyroid | 89 | 42 |
| **Sum** | **603** | **256** |
| Internal-Test | Brain | 165 | 114 |
| Breast | 133 | 50 |
| H&N | 131 | 54 |
| Lung | 151 | 67 |
| Ovary | 140 | 56 |
| Thyroid | 175 | 80 |
| **Sum** | **895** | **421** |

Table S4.2. Data distribution of the SYCC cohort in pan-cancer classification.

| Organ | Cases | Slides | PositiveCase |
| --- | --- | --- | --- |
| Brain | 30 | 38 | 28 |
| Breast | 186 | 585 | 23 |
| H&N | 207 | 626 | 56 |
| Lung | 201 | 253 | 167 |
| Ovary | 38 | 74 | 6 |
| Thyroid | 182 | 284 | 78 |
| Bile Duct | 35 | 73 | 5 |
| Cervix | 43 | 163 | 5 |
| Colorectum | 7 | 20 | 2 |
| Liver | 13 | 30 | 8 |
| Lymph Node | 486 | 2152 | 152 |
| Pancreas | 13 | 29 | 3 |
| Pleura | 7 | 13 | 2 |
| Skin | 42 | 265 | 25 |
| Soft Tissue | 29 | 55 | 13 |
| Uterus | 145 | 307 | 38 |
| Else | 12 | 22 | 3 |
| **Sum** | **1676** | **4989** | **614** |

Table S4.3. Data distribution of the ZSH cohort in pan-cancer classification.

| Organ | Cases | Slides | PositiveCase |
| --- | --- | --- | --- |
| Brain | 669 | 700 | 587 |
| Breast | 682 | 898 | 169 |
| H&N | 293 | 514 | 73 |
| Lung | 561 | 760 | 413 |
| Ovary | 119 | 209 | 27 |
| Thyroid | 206 | 294 | 78 |
| Bile Duct | 35 | 48 | 8 |
| Cervix | 77 | 117 | 20 |
| Colorectum | 146 | 167 | 69 |
| Liver | 25 | 29 | 11 |
| Lymph Node | 241 | 495 | 48 |
| Pancreas | 8 | 9 | 3 |
| Pleura | 11 | 13 | 4 |
| Skin | 56 | 147 | 15 |
| Soft Tissue | 50 | 77 | 14 |
| Uterus | 35 | 59 | 2 |
| Else | 130 | 161 | 24 |
| **Sum** | **3344** | **4697** | **1565** |

Table S4.4. Data distribution of the NFH cohort in pan-cancer classification.

| Organ | Cases | Slides | PositiveCase |
| --- | --- | --- | --- |
| Brain | 20 | 21 | 13 |
| Breast | 314 | 356 | 92 |
| H&N | 25 | 42 | 5 |
| Lung | 151 | 207 | 136 |
| Ovary | 45 | 73 | 20 |
| Thyroid | 182 | 244 | 145 |
| Bile Duct | 3 | 4 | 1 |
| Cervix | 10 | 11 | 1 |
| Colorectum | 4 | 4 | 2 |
| Liver | 2 | 2 | 1 |
| Lymph Node | 24 | 41 | 5 |
| Pancreas | 2 | 2 | 1 |
| Pleura | 6 | 6 | 3 |
| Skin | 8 | 9 | 2 |
| Soft Tissue | 5 | 6 | 1 |
| Uterus | 39 | 56 | 1 |
| Else | 7 | 10 | 3 |
| **Sum** | **847** | **1094** | **432** |

Table S4.5. Data distribution of the HDGZ cohort in pan-cancer classification.

| Cohort | Model | AUROC | Spe (at 95% Sen) | Accuracy | F1 |
| --- | --- | --- | --- | --- | --- |
| SYCC | CHIEF | 0.954 (0.941,0.967) | 0.811 (0.779, 0.846) | 0.903 (0.885, 0.919) | 0.897 (0.875, 0.916) |
| CONCH | 0.976 (0.969,0.984) | 0.850 (0.821, 0.880) | 0.932 (0.914, 0.946) | 0.928 (0.911, 0.945) |
| UNI | 0.978 (0.970,0.986) | 0.880 (0.852, 0.908) | 0.939 (0.924, 0.954) | 0.937 (0.920, 0.951) |
| Virchow | 0.976 (0.967,0.985) | 0.916 (0.893, 0.938) | 0.945 (0.932, 0.959) | 0.942 (0.925, 0.957) |
| Virchow2 | 0.988 (0.982,0.993) | 0.923 (0.901, 0.947) | **0.958 (0.945, 0.970)** | **0.955 (0.941, 0.968)** |
| CRISP | **0.990 (0.985,0.994)** | **0.940 (0.920, 0.960)** | 0.957 (0.945, 0.968) | 0.954 (0.941, 0.969) |
| ZSH | CHIEF | 0.755 (0.731,0.779) | 0.240 (0.214, 0.266) | 0.705 (0.685, 0.727) | 0.618 (0.587, 0.650) |
| CONCH | 0.886 (0.868,0.903) | 0.429 (0.400, 0.461) | 0.838 (0.821, 0.855) | 0.763 (0.735, 0.791) |
| UNI | 0.876 (0.858,0.893) | 0.439 (0.411, 0.470) | 0.800 (0.780, 0.819) | 0.737 (0.709, 0.763) |
| Virchow | 0.752 (0.729,0.776) | 0.339 (0.312, 0.367) | 0.693 (0.671, 0.715) | 0.660 (0.633, 0.687) |
| Virchow2 | 0.879 (0.863,0.896) | 0.521 (0.492, 0.551) | 0.791 (0.770, 0.811) | 0.747 (0.717, 0.769) |
| CRISP | **0.953 (0.943,0.963)** | **0.723 (0.699, 0.750)** | **0.893 (0.878, 0.907)** | **0.856 (0.836, 0.878)** |
| NFH | CHIEF | 0.840 (0.827,0.853) | 0.365 (0.343, 0.388) | 0.771 (0.757, 0.786) | 0.757 (0.741, 0.772) |
| CONCH | 0.801 (0.786,0.816) | 0.165 (0.148, 0.182) | 0.748 (0.733, 0.762) | 0.718 (0.699, 0.734) |
| UNI | 0.900 (0.889,0.910) | 0.485 (0.463, 0.508) | 0.833 (0.820, 0.845) | 0.819 (0.804, 0.834) |
| Virchow | 0.878 (0.866,0.890) | 0.367 (0.344, 0.388) | 0.809 (0.795, 0.822) | 0.785 (0.768, 0.800) |
| Virchow2 | 0.952 (0.945,0.959) | 0.720 (0.700, 0.743) | 0.894 (0.885, 0.904) | 0.886 (0.873, 0.897) |
| CRISP | **0.973 (0.968,0.977)** | **0.879 (0.864, 0.894)** | **0.919 (0.909, 0.927)** | **0.915 (0.904, 0.925)** |
| HDGZ | CHIEF | 0.757 (0.724,0.789) | 0.161 (0.128, 0.197) | 0.711 (0.678, 0.741) | 0.740 (0.708, 0.771) |
| CONCH | 0.796 (0.765,0.826) | 0.152 (0.117, 0.190) | 0.744 (0.713, 0.772) | 0.721 (0.686, 0.755) |
| UNI | 0.907 (0.886,0.927) | 0.523 (0.475, 0.569) | 0.848 (0.823, 0.871) | 0.850 (0.824, 0.876) |
| Virchow | 0.847 (0.820,0.873) | 0.299 (0.257, 0.342) | 0.787 (0.761, 0.816) | 0.789 (0.758, 0.819) |
| Virchow2 | 0.869 (0.845,0.892) | 0.388 (0.345, 0.435) | 0.803 (0.774, 0.830) | 0.796 (0.763, 0.824) |
| CRISP | **0.960 (0.948,0.973)** | **0.778 (0.739, 0.819)** | **0.913 (0.896, 0.932)** | **0.912 (0.891, 0.932)** |

Table S4.6. Comparative overall performance of different models for pan-cancer classification across four cohorts.

| Cohort | Model | AUROC | Spe (at 95% Sen) | Accuracy | F1 |
| --- | --- | --- | --- | --- | --- |
| SYCC | CHIEF | 0.992 | 0.976 | 0.967 | 0.963 |
| CONCH | 0.995 | **1.000** | 0.980 | 0.977 |
| UNI | 0.998 | **1.000** | 0.980 | 0.977 |
| Virchow | 0.997 | **1.000** | 0.987 | 0.985 |
| Virchow2 | 0.999 | **1.000** | 0.987 | 0.985 |
| CRISP | **1.000** | **1.000** | **1.000** | **1.000** |
| ZSH | CHIEF | 0.856 | 0.441 | 0.861 | 0.915 |
| CONCH | 0.898 | 0.471 | 0.756 | 0.829 |
| UNI | 0.949 | 0.735 | 0.905 | 0.941 |
| Virchow | 0.940 | 0.706 | 0.905 | 0.942 |
| Virchow2 | 0.961 | 0.853 | 0.900 | 0.937 |
| CRISP | **0.983** | **0.882** | **0.925** | **0.953** |
| NFH | CHIEF | 0.897 | 0.561 | 0.852 | 0.896 |
| CONCH | 0.906 | 0.466 | 0.786 | 0.837 |
| UNI | 0.908 | 0.426 | 0.813 | 0.860 |
| Virchow | 0.906 | 0.351 | 0.845 | 0.888 |
| Virchow2 | 0.944 | 0.770 | 0.893 | 0.925 |
| CRISP | **0.965** | **0.858** | **0.906** | **0.933** |
| HDGZ | CHIEF | 0.830 | 0.067 | 0.781 | 0.864 |
| CONCH | 0.775 | 0.133 | 0.715 | 0.815 |
| UNI | 0.959 | 1.000 | **0.960** | **0.977** |
| Virchow | 0.885 | 0.267 | 0.881 | 0.930 |
| Virchow2 | 0.887 | 0.333 | 0.868 | 0.922 |
| CRISP | **0.984** | **0.933** | 0.934 | 0.962 |
| Overall | CHIEF | 0.901 (0.881,0.921) | 0.523 (0.466, 0.580) | 0.842 (0.820, 0.863) | 0.888 (0.870, 0.903) |
| CONCH | 0.922 (0.905,0.938) | 0.580 (0.526, 0.635) | 0.820 (0.795, 0.842) | 0.866 (0.846, 0.884) |
| UNI | 0.942 (0.929,0.955) | 0.673 (0.616, 0.723) | 0.861 (0.839, 0.880) | 0.900 (0.883, 0.916) |
| Virchow | 0.931 (0.916,0.946) | 0.594 (0.536, 0.654) | 0.852 (0.832, 0.872) | 0.893 (0.874, 0.908) |
| Virchow2 | 0.959 (0.947,0.971) | 0.811 (0.766, 0.857) | 0.904 (0.884, 0.921) | 0.933 (0.920, 0.946) |
| CRISP | **0.977 (0.968,0.987)** | **0.911 (0.878, 0.944)** | **0.933 (0.919, 0.948)** | **0.954 (0.943, 0.965)** |

Table S4.7. Comparative performance of models in lung subgroup of pan-cancer classification task.

| Cohort | Model | AUROC | Spe (at 95% Sen) | Accuracy | F1 |
| --- | --- | --- | --- | --- | --- |
| SYCC | CHIEF | 0.971 | 0.855 | 0.887 | 0.870 |
| CONCH | 0.978 | 0.867 | 0.910 | 0.891 |
| UNI | 0.997 | **1.000** | 0.985 | 0.980 |
| Virchow | 0.975 | 0.747 | 0.947 | 0.931 |
| Virchow2 | **0.998** | **1.000** | **0.992** | **0.990** |
| CRISP | 0.997 | **1.000** | **0.992** | **0.990** |
| ZSH | CHIEF | 0.811 | 0.466 | 0.828 | 0.484 |
| CONCH | 0.881 | 0.577 | 0.812 | 0.533 |
| UNI | 0.886 | 0.362 | 0.801 | 0.519 |
| Virchow | 0.813 | 0.466 | 0.753 | 0.439 |
| Virchow2 | 0.894 | 0.687 | 0.828 | 0.543 |
| CRISP | **0.961** | **0.939** | **0.941** | **0.800** |
| NFH | CHIEF | 0.789 | 0.172 | 0.770 | 0.590 |
| CONCH | 0.912 | 0.520 | 0.868 | 0.755 |
| UNI | 0.932 | 0.651 | 0.871 | 0.771 |
| Virchow | 0.919 | 0.493 | 0.908 | 0.807 |
| Virchow2 | 0.970 | 0.797 | 0.933 | 0.873 |
| CRISP | **0.983** | **0.922** | **0.956** | **0.913** |
| HDGZ | CHIEF | 0.808 | 0.419 | 0.736 | 0.641 |
| CONCH | 0.817 | 0.180 | 0.764 | 0.667 |
| UNI | 0.939 | **0.505** | 0.908 | 0.840 |
| Virchow | 0.880 | 0.455 | 0.841 | 0.740 |
| Virchow2 | 0.902 | 0.432 | 0.876 | 0.785 |
| CRISP | **0.942** | **0.505** | **0.936** | **0.884** |
| Overall | CHIEF | 0.820 (0.792,0.847) | 0.242 (0.216, 0.269) | 0.794 (0.772, 0.815) | 0.626 (0.584, 0.668) |
| CONCH | 0.870 (0.845,0.894) | 0.328 (0.298, 0.356) | 0.824 (0.805, 0.844) | 0.680 (0.639, 0.720) |
| UNI | 0.927 (0.911,0.942) | 0.665 (0.635, 0.694) | 0.867 (0.847, 0.884) | 0.763 (0.727, 0.795) |
| Virchow | 0.892 (0.870,0.914) | 0.398 (0.366, 0.427) | 0.858 (0.840, 0.876) | 0.726 (0.688, 0.760) |
| Virchow2 | 0.952 (0.939,0.966) | 0.663 (0.633, 0.691) | 0.910 (0.893, 0.925) | 0.833 (0.804, 0.861) |
| CRISP | **0.970 (0.959,0.981)** | **0.863 (0.841, 0.883)** | **0.937 (0.924, 0.950)** | **0.880 (0.855, 0.905)** |

Table S4.8. Comparative performance of models in breast subgroup of pan-cancer classification task.

| Cohort | Model | AUROC | Spe (at 95% Sen) | Accuracy | F1 |
| --- | --- | --- | --- | --- | --- |
| SYCC | CHIEF | 0.873 | 0.411 | 0.834 | 0.810 |
| CONCH | 0.908 | 0.505 | 0.863 | 0.844 |
| UNI | 0.938 | 0.568 | 0.874 | 0.867 |
| Virchow | 0.932 | 0.653 | 0.874 | 0.867 |
| Virchow2 | 0.946 | **0.716** | **0.897** | **0.873** |
| CRISP | **0.953** | 0.653 | 0.891 | 0.871 |
| ZSH | CHIEF | 0.772 | 0.317 | 0.703 | 0.703 |
| CONCH | 0.898 | 0.356 | 0.852 | 0.821 |
| UNI | 0.879 | 0.481 | 0.824 | 0.778 |
| Virchow | 0.876 | 0.442 | 0.808 | 0.793 |
| Virchow2 | 0.946 | 0.692 | 0.868 | 0.846 |
| CRISP | **0.965** | **0.788** | **0.912** | **0.899** |
| NFH | CHIEF | 0.880 | 0.484 | 0.816 | 0.753 |
| CONCH | 0.903 | 0.250 | 0.888 | 0.835 |
| UNI | 0.877 | 0.156 | 0.864 | 0.797 |
| Virchow | 0.860 | 0.250 | 0.806 | 0.765 |
| Virchow2 | 0.954 | 0.609 | 0.917 | 0.881 |
| CRISP | **0.974** | **0.859** | **0.942** | **0.923** |
| HDGZ | CHIEF | 0.883 | 0.351 | 0.813 | 0.871 |
| CONCH | 0.742 | 0.189 | 0.665 | 0.749 |
| UNI | 0.937 | 0.649 | 0.857 | 0.902 |
| Virchow | 0.902 | 0.459 | 0.863 | 0.908 |
| Virchow2 | 0.920 | 0.541 | 0.835 | 0.886 |
| CRISP | **0.959** | **0.865** | **0.912** | **0.942** |
| Overall | CHIEF | 0.865 (0.839,0.891) | 0.382 (0.332, 0.433) | 0.805 (0.776, 0.832) | 0.800 (0.767, 0.830) |
| CONCH | 0.792 (0.760,0.824) | 0.245 (0.200, 0.291) | 0.734 (0.703, 0.765) | 0.724 (0.687, 0.758) |
| UNI | 0.913 (0.892,0.934) | 0.503 (0.450, 0.553) | 0.860 (0.835, 0.885) | 0.854 (0.825, 0.880) |
| Virchow | 0.848 (0.820,0.877) | 0.245 (0.203, 0.290) | 0.791 (0.761, 0.820) | 0.792 (0.759, 0.822) |
| Virchow2 | 0.926 (0.908,0.945) | 0.607 (0.557, 0.660) | 0.860 (0.835, 0.885) | 0.861 (0.833, 0.886) |
| CRISP | **0.965 (0.954,0.977)** | **0.805 (0.762, 0.845)** | **0.917 (0.897, 0.937)** | **0.918 (0.897, 0.938)** |

Table S4.9. Comparative performance of models in thyroid subgroup of pan-cancer classification task.

| Cohort | Model | AUROC | Spe (at 95% Sen) | Accuracy | F1 |
| --- | --- | --- | --- | --- | --- |
| SYCC | CHIEF | 0.947 | 0.584 | 0.916 | 0.897 |
| CONCH | 0.985 | 0.792 | 0.962 | 0.952 |
| UNI | 0.987 | 0.883 | 0.962 | 0.952 |
| Virchow | 0.989 | 0.935 | 0.954 | 0.947 |
| Virchow2 | **1.000** | **1.000** | **0.992** | **0.991** |
| CRISP | 0.996 | 0.935 | 0.977 | 0.971 |
| ZSH | CHIEF | 0.771 | 0.126 | 0.725 | 0.590 |
| CONCH | 0.861 | 0.338 | 0.787 | 0.676 |
| UNI | 0.853 | 0.464 | 0.816 | 0.703 |
| Virchow | 0.848 | 0.576 | 0.787 | 0.681 |
| Virchow2 | 0.885 | 0.543 | 0.744 | 0.667 |
| CRISP | **0.957** | **0.874** | **0.899** | **0.837** |
| NFH | CHIEF | 0.713 | 0.127 | 0.700 | 0.532 |
| CONCH | 0.794 | 0.200 | 0.768 | 0.580 |
| UNI | 0.850 | 0.273 | 0.826 | 0.687 |
| Virchow | 0.791 | 0.282 | 0.706 | 0.578 |
| Virchow2 | 0.910 | 0.518 | 0.874 | 0.764 |
| CRISP | **0.921** | **0.541** | **0.891** | **0.787** |
| HDGZ | CHIEF | 0.650 | 0.500 | 0.600 | 0.500 |
| CONCH | 0.520 | 0.250 | 0.400 | 0.400 |
| UNI | **0.820** | **0.550** | 0.800 | 0.615 |
| Virchow | 0.480 | 0.150 | 0.400 | 0.211 |
| Virchow2 | 0.530 | 0.200 | 0.400 | 0.118 |
| CRISP | **0.820** | **0.550** | **0.920** | **0.750** |
| Overall | CHIEF | 0.799 (0.760,0.838) | 0.237 (0.200, 0.274) | 0.720 (0.688, 0.755) | 0.613 (0.562, 0.663) |
| CONCH | 0.860 (0.827,0.892) | 0.361 (0.317, 0.404) | 0.802 (0.771, 0.832) | 0.680 (0.626, 0.732) |
| UNI | 0.885 (0.857,0.913) | 0.511 (0.464, 0.558) | 0.828 (0.799, 0.857) | 0.718 (0.668, 0.765) |
| Virchow | 0.853 (0.820,0.886) | 0.436 (0.391, 0.482) | 0.747 (0.715, 0.777) | 0.667 (0.621, 0.713) |
| Virchow2 | 0.918 (0.893,0.942) | 0.530 (0.488, 0.578) | 0.855 (0.826, 0.881) | 0.774 (0.730, 0.816) |
| CRISP | **0.951 (0.933,0.970)** | **0.737 (0.693, 0.778)** | **0.907 (0.884, 0.928)** | **0.843 (0.803, 0.881)** |

Table S4.10. Comparative performance of models in H&N subgroup of pan-cancer classification task.

| Cohort | Model | AUROC | Spe (at 95% Sen) | Accuracy | F1 |
| --- | --- | --- | --- | --- | --- |
| SYCC | CHIEF | 0.963 | 0.902 | 0.945 | 0.960 |
| CONCH | 0.997 | 0.980 | 0.964 | 0.973 |
| UNI | 0.995 | 0.980 | 0.970 | 0.978 |
| Virchow | 0.994 | 0.980 | 0.970 | 0.978 |
| Virchow2 | **0.999** | **1.000** | **0.994** | **0.996** |
| CRISP | **0.999** | **1.000** | 0.988 | 0.991 |
| ZSH | CHIEF | 0.929 | 0.000 | 0.933 | 0.963 |
| CONCH | 0.714 | 0.000 | 0.600 | 0.727 |
| UNI | 0.946 | 0.500 | 0.933 | 0.963 |
| Virchow | 0.786 | 0.000 | 0.800 | 0.880 |
| Virchow2 | 0.946 | 0.500 | 0.933 | 0.963 |
| CRISP | **1.000** | **1.000** | **1.000** | **1.000** |
| NFH | CHIEF | 0.923 | 0.573 | 0.753 | 0.837 |
| CONCH | 0.752 | 0.098 | 0.638 | 0.747 |
| UNI | 0.910 | 0.561 | 0.825 | 0.892 |
| Virchow | 0.927 | 0.512 | 0.833 | 0.896 |
| Virchow2 | 0.959 | **0.756** | 0.861 | 0.915 |
| CRISP | **0.961** | 0.744 | **0.886** | **0.932** |
| HDGZ | CHIEF | 0.725 | 0.143 | 0.800 | 0.857 |
| CONCH | 0.659 | 0.143 | 0.700 | 0.700 |
| UNI | 0.868 | 0.571 | 0.850 | 0.897 |
| Virchow | 0.626 | 0.000 | 0.650 | 0.667 |
| Virchow2 | 0.945 | 0.286 | 0.950 | 0.960 |
| CRISP | **1.000** | **1.000** | **1.000** | **1.000** |
| Overall | CHIEF | 0.925 (0.903,0.947) | 0.641 (0.568, 0.720) | 0.836 (0.811, 0.860) | 0.894 (0.875, 0.910) |
| CONCH | 0.845 (0.814,0.876) | 0.373 (0.297, 0.449) | 0.699 (0.669, 0.730) | 0.788 (0.763, 0.813) |
| UNI | 0.939 (0.921,0.957) | 0.697 (0.622, 0.771) | 0.855 (0.834, 0.877) | 0.908 (0.891, 0.923) |
| Virchow | 0.944 (0.929,0.958) | 0.606 (0.522, 0.694) | 0.861 (0.838, 0.882) | 0.911 (0.895, 0.926) |
| Virchow2 | 0.973 (0.963,0.983) | 0.824 (0.756, 0.888) | 0.911 (0.891, 0.930) | 0.945 (0.932, 0.957) |
| CRISP | **0.977 (0.967,0.987)** | **0.852 (0.789, 0.907)** | **0.917 (0.899, 0.934)** | **0.949 (0.937, 0.960)** |

Table S4.11. Comparative performance of models in brain subgroup of pan-cancer classification task.

| Cohort | Model | AUROC | Spe (at 95% Sen) | Accuracy | F1 |
| --- | --- | --- | --- | --- | --- |
| SYCC | CHIEF | 0.984 | 0.905 | 0.936 | 0.924 |
| CONCH | 0.998 | 0.988 | 0.986 | 0.982 |
| UNI | 0.989 | 0.976 | 0.971 | 0.964 |
| Virchow | 0.992 | 0.976 | 0.979 | 0.972 |
| Virchow2 | **0.999** | **1.000** | **0.993** | **0.991** |
| CRISP | **0.999** | **1.000** | **0.993** | **0.991** |
| ZSH | CHIEF | 0.677 | 0.250 | 0.711 | 0.421 |
| CONCH | 0.974 | 0.938 | 0.947 | 0.857 |
| UNI | 0.891 | 0.531 | 0.842 | 0.625 |
| Virchow | 0.953 | 0.875 | 0.895 | 0.750 |
| Virchow2 | **0.995** | **0.969** | **0.974** | **0.923** |
| CRISP | 0.984 | **0.969** | **0.974** | **0.923** |
| NFH | CHIEF | 0.925 | 0.837 | 0.866 | 0.765 |
| CONCH | 0.987 | 0.913 | 0.966 | 0.926 |
| UNI | 0.952 | 0.728 | 0.891 | 0.787 |
| Virchow | 0.980 | 0.924 | 0.924 | 0.857 |
| Virchow2 | 0.979 | 0.924 | 0.966 | 0.926 |
| CRISP | **0.994** | **0.978** | **0.983** | **0.964** |
| HDGZ | CHIEF | 0.812 | 0.360 | 0.800 | 0.769 |
| CONCH | 0.898 | 0.440 | 0.867 | 0.833 |
| UNI | 0.922 | 0.600 | 0.867 | 0.842 |
| Virchow | 0.912 | 0.560 | 0.844 | 0.829 |
| Virchow2 | 0.924 | 0.560 | **0.889** | 0.872 |
| CRISP | **0.956** | **0.840** | **0.889** | **0.884** |
| Overall | CHIEF | 0.928 (0.899,0.958) | 0.738 (0.680, 0.794) | 0.842 (0.804, 0.877) | 0.789 (0.731, 0.842) |
| CONCH | 0.959 (0.940,0.978) | 0.807 (0.758, 0.855) | 0.906 (0.871, 0.936) | 0.857 (0.806, 0.902) |
| UNI | 0.966 (0.947,0.984) | 0.803 (0.752, 0.857) | 0.912 (0.880, 0.942) | 0.862 (0.814, 0.908) |
| Virchow | 0.959 (0.938,0.981) | 0.760 (0.703, 0.815) | 0.898 (0.863, 0.927) | 0.854 (0.804, 0.898) |
| Virchow2 | 0.981 (0.969,0.993) | 0.893 (0.853, 0.931) | 0.950 (0.927, 0.971) | 0.922 (0.883, 0.955) |
| CRISP | **0.990 (0.982,0.998)** | **0.966 (0.941, 0.987)** | **0.962 (0.939, 0.980)** | **0.942 (0.908, 0.971)** |

Table S4.12. Comparative performance of models in ovary subgroup of pan-cancer classification task.

| Cohort | Model | AUROC | Spe (at 95% Sen) | Accuracy | F1 |
| --- | --- | --- | --- | --- | --- |
| ZSH | CHIEF | 0.745 | 0.269 | 0.667 | 0.593 |
| CONCH | 0.855 | 0.317 | 0.856 | 0.731 |
| UNI | 0.813 | 0.296 | 0.811 | 0.638 |
| Virchow | 0.617 | 0.132 | 0.628 | 0.478 |
| Virchow2 | 0.792 | 0.278 | 0.796 | 0.602 |
| CRISP | **0.936** | **0.614** | **0.901** | **0.834** |
| NFH | CHIEF | 0.805 | 0.301 | 0.776 | 0.578 |
| CONCH | 0.834 | 0.223 | 0.876 | 0.688 |
| UNI | 0.877 | 0.534 | 0.780 | 0.619 |
| Virchow | 0.872 | 0.477 | 0.838 | 0.649 |
| Virchow2 | 0.939 | 0.699 | 0.909 | 0.780 |
| CRISP | **0.956** | **0.715** | **0.929** | **0.835** |
| HDGZ | CHIEF | 0.621 | 0.211 | 0.792 | 0.444 |
| CONCH | 0.800 | 0.316 | 0.875 | 0.667 |
| UNI | 0.895 | 0.684 | 0.750 | 0.625 |
| Virchow | 0.937 | 0.842 | 0.875 | 0.769 |
| Virchow2 | **0.979** | **0.895** | **0.917** | **0.833** |
| CRISP | 0.968 | 0.842 | 0.875 | 0.769 |
| Overall | CHIEF | 0.765 (0.728,0.802) | 0.273 (0.235, 0.309) | 0.699 (0.668, 0.732) | 0.569 (0.511, 0.617) |
| CONCH | 0.855 (0.820,0.890) | 0.249 (0.213, 0.287) | 0.874 (0.850, 0.896) | 0.726 (0.673, 0.778) |
| UNI | 0.829 (0.796,0.862) | 0.425 (0.383, 0.464) | 0.688 (0.658, 0.722) | 0.602 (0.554, 0.646) |
| Virchow | 0.727 (0.687,0.766) | 0.273 (0.237, 0.312) | 0.601 (0.565, 0.634) | 0.534 (0.489, 0.579) |
| Virchow2 | 0.840 (0.809,0.872) | 0.390 (0.349, 0.431) | 0.738 (0.707, 0.770) | 0.620 (0.571, 0.670) |
| CRISP | **0.944 (0.927,0.962)** | **0.707 (0.665, 0.743)** | **0.911 (0.889, 0.928)** | **0.829 (0.786, 0.869)** |

Table S4.13. Comparative performance of models in LN subgroup of pan-cancer classification task.

| Cohort | Model | AUROC | Spe (at 95% Sen) | Accuracy | F1 |
| --- | --- | --- | --- | --- | --- |
| ZSH | CHIEF | 0.878 | 0.346 | 0.883 | 0.767 |
| CONCH | 0.902 | 0.187 | 0.862 | 0.767 |
| UNI | 0.902 | 0.449 | 0.855 | 0.747 |
| Virchow | 0.874 | 0.393 | 0.828 | 0.725 |
| Virchow2 | 0.945 | 0.720 | 0.876 | 0.800 |
| CRISP | **0.966** | **0.860** | **0.890** | **0.826** |
| NFH | CHIEF | 0.939 | 0.939 | 0.943 | 0.667 |
| CONCH | 0.955 | 0.909 | 0.914 | 0.571 |
| UNI | 0.939 | 0.879 | 0.886 | 0.500 |
| Virchow | 0.955 | 0.909 | 0.914 | 0.571 |
| Virchow2 | 0.727 | 0.636 | 0.657 | 0.250 |
| CRISP | **1.000** | **1.000** | **1.000** | **1.000** |
| HDGZ | CHIEF | 0.974 | 0.974 | 0.974 | 0.667 |
| CONCH | **1.000** | **1.000** | **1.000** | **1.000** |
| UNI | 0.842 | 0.842 | 0.846 | 0.250 |
| Virchow | **1.000** | **1.000** | **1.000** | **1.000** |
| Virchow2 | **1.000** | **1.000** | **1.000** | **1.000** |
| CRISP | **1.000** | **1.000** | **1.000** | **1.000** |
| Overall | CHIEF | 0.843 (0.781,0.906) | 0.562 (0.486, 0.637) | 0.840 (0.790, 0.886) | 0.624 (0.494, 0.738) |
| CONCH | 0.911 (0.851,0.972) | 0.517 (0.443, 0.584) | 0.854 (0.808, 0.895) | 0.692 (0.589, 0.790) |
| UNI | 0.872 (0.814,0.931) | 0.646 (0.574, 0.718) | 0.763 (0.703, 0.817) | 0.587 (0.479, 0.679) |
| Virchow | 0.877 (0.813,0.940) | 0.506 (0.433, 0.576) | 0.813 (0.758, 0.863) | 0.643 (0.529, 0.737) |
| Virchow2 | 0.933 (0.887,0.979) | 0.697 (0.627, 0.762) | **0.872 (0.831, 0.918)** | 0.725 (0.621, 0.817) |
| CRISP | **0.967 (0.945,0.989)** | **0.848 (0.798, 0.898)** | 0.868 (0.817, 0.909) | **0.734 (0.635, 0.816)** |

Table S4.14. Comparative performance of models in uterus subgroup of pan-cancer classification task.

| Cohort | Model | AUROC | Spe (at 95% Sen) | Accuracy | F1 |
| --- | --- | --- | --- | --- | --- |
| ZSH | CHIEF | 0.732 | 0.526 | 0.581 | 0.357 |
| CONCH | 0.916 | 0.763 | 0.791 | 0.526 |
| UNI | 0.947 | 0.816 | 0.837 | 0.588 |
| Virchow | 0.868 | 0.763 | 0.791 | 0.526 |
| Virchow2 | 0.858 | 0.447 | 0.884 | 0.615 |
| CRISP | **0.995** | **0.974** | **0.977** | **0.909** |
| NFH | CHIEF | 0.803 | 0.404 | 0.675 | 0.590 |
| CONCH | 0.841 | 0.684 | 0.753 | 0.667 |
| UNI | 0.804 | 0.351 | 0.831 | 0.629 |
| Virchow | 0.797 | 0.579 | 0.675 | 0.603 |
| Virchow2 | 0.896 | 0.474 | 0.909 | 0.811 |
| CRISP | **0.974** | **0.965** | **0.961** | **0.927** |
| HDGZ | CHIEF | 0.889 | 0.889 | 0.900 | 0.667 |
| CONCH | **1.000** | **1.000** | **1.000** | **1.000** |
| UNI | **1.000** | **1.000** | **1.000** | **1.000** |
| Virchow | **1.000** | **1.000** | **1.000** | **1.000** |
| Virchow2 | **1.000** | **1.000** | **1.000** | **1.000** |
| CRISP | **1.000** | **1.000** | **1.000** | **1.000** |
| Overall | CHIEF | 0.733 (0.633,0.833) | 0.298 (0.215, 0.385) | 0.562 (0.469, 0.646) | 0.457 (0.337, 0.566) |
| CONCH | 0.881 (0.820,0.941) | 0.635 (0.540, 0.726) | 0.823 (0.754, 0.885) | 0.657 (0.500, 0.779) |
| UNI | 0.858 (0.776,0.941) | 0.356 (0.265, 0.449) | 0.715 (0.638, 0.792) | 0.554 (0.416, 0.667) |
| Virchow | 0.848 (0.776,0.919) | 0.673 (0.586, 0.762) | 0.731 (0.654, 0.808) | 0.588 (0.447, 0.706) |
| Virchow2 | 0.898 (0.826,0.969) | 0.490 (0.389, 0.590) | 0.915 (0.869, 0.962) | 0.776 (0.621, 0.893) |
| CRISP | **0.980 (0.956,1.000)** | **0.865 (0.800, 0.926)** | **0.954 (0.915, 0.985)** | **0.889 (0.780, 0.964)** |

Table S4.15. Comparative performance of models in cervix subgroup of pan-cancer classification task.

| Cohort | Model | AUROC | Spe (at 95% Sen) | Accuracy | F1 |
| --- | --- | --- | --- | --- | --- |
| ZSH | CHIEF | 0.835 | 0.294 | 0.833 | 0.868 |
| CONCH | 0.911 | 0.529 | **0.881** | **0.898** |
| UNI | 0.864 | 0.294 | 0.786 | 0.791 |
| Virchow | 0.852 | 0.294 | 0.786 | 0.809 |
| Virchow2 | 0.934 | 0.412 | 0.905 | 0.913 |
| CRISP | **0.941** | **0.588** | **0.881** | **0.898** |
| NFH | CHIEF | 0.777 | 0.195 | 0.768 | 0.649 |
| CONCH | 0.792 | 0.268 | 0.839 | 0.667 |
| UNI | 0.911 | 0.317 | 0.875 | 0.800 |
| Virchow | 0.837 | 0.049 | 0.875 | 0.774 |
| Virchow2 | 0.902 | 0.195 | **0.929** | **0.857** |
| CRISP | **0.925** | **0.415** | 0.893 | 0.813 |
| HDGZ | CHIEF | 0.833 | 0.833 | 0.875 | 0.800 |
| CONCH | **1.000** | **1.000** | **1.000** | **1.000** |
| UNI | **1.000** | **1.000** | **1.000** | **1.000** |
| Virchow | 0.833 | 0.667 | 0.750 | 0.667 |
| Virchow2 | **1.000** | **1.000** | **1.000** | **1.000** |
| CRISP | **1.000** | **1.000** | **1.000** | **1.000** |
| Overall | CHIEF | 0.819 (0.736,0.903) | 0.391 (0.277, 0.508) | 0.774 (0.689, 0.849) | 0.755 (0.652, 0.835) |
| CONCH | 0.870 (0.796,0.943) | 0.375 (0.262, 0.493) | 0.840 (0.764, 0.906) | 0.805 (0.699, 0.889) |
| UNI | 0.900 (0.838,0.961) | 0.531 (0.407, 0.652) | 0.821 (0.745, 0.887) | 0.796 (0.700, 0.872) |
| Virchow | 0.858 (0.776,0.940) | 0.219 (0.121, 0.324) | 0.830 (0.755, 0.887) | 0.791 (0.676, 0.874) |
| Virchow2 | 0.929 (0.872,0.986) | 0.438 (0.312, 0.561) | **0.906 (0.849, 0.962)** | **0.875 (0.783, 0.944)** |
| CRISP | **0.943 (0.897,0.988)** | **0.672 (0.548, 0.778)** | 0.887 (0.821, 0.943) | 0.860 (0.775, 0.927) |

Table S4.16. Comparative performance of models in skin subgroup of pan-cancer classification task.

| Cohort | Model | AUROC | Spe (at 95% Sen) | Accuracy | F1 |
| --- | --- | --- | --- | --- | --- |
| ZSH | CHIEF | 0.767 | 0.100 | 0.857 | 0.615 |
| CONCH | 0.447 | 0.167 | 0.229 | 0.182 |
| UNI | 0.747 | 0.333 | 0.829 | 0.500 |
| Virchow | 0.607 | 0.133 | 0.686 | 0.353 |
| Virchow2 | 0.693 | 0.167 | 0.914 | 0.667 |
| CRISP | **0.940** | **0.700** | **0.971** | **0.889** |
| NFH | CHIEF | 0.870 | 0.444 | 0.829 | 0.700 |
| CONCH | 0.954 | 0.852 | 0.886 | 0.800 |
| UNI | 0.968 | **0.926** | **0.943** | **0.889** |
| Virchow | 0.856 | 0.667 | 0.743 | 0.640 |
| Virchow2 | 0.926 | 0.519 | 0.886 | 0.778 |
| CRISP | **0.981** | 0.889 | 0.914 | 0.842 |
| HDGZ | CHIEF | **1.000** | **1.000** | **1.000** | **1.000** |
| CONCH | **1.000** | **1.000** | **1.000** | **1.000** |
| UNI | **1.000** | **1.000** | **1.000** | **1.000** |
| Virchow | **1.000** | **1.000** | **1.000** | **1.000** |
| Virchow2 | **1.000** | **1.000** | **1.000** | **1.000** |
| CRISP | **1.000** | **1.000** | **1.000** | **1.000** |
| Overall | CHIEF | 0.783 (0.633,0.934) | 0.153 (0.068, 0.254) | 0.849 (0.780, 0.932) | 0.621 (0.370, 0.800) |
| CONCH | 0.835 (0.687,0.984) | 0.254 (0.145, 0.370) | 0.904 (0.836, 0.973) | 0.741 (0.522, 0.889) |
| UNI | 0.887 (0.791,0.984) | 0.407 (0.268, 0.535) | 0.890 (0.822, 0.959) | 0.750 (0.533, 0.903) |
| Virchow | 0.774 (0.632,0.915) | 0.119 (0.048, 0.197) | 0.740 (0.644, 0.836) | 0.537 (0.324, 0.696) |
| Virchow2 | 0.854 (0.730,0.977) | 0.322 (0.213, 0.456) | 0.904 (0.836, 0.959) | 0.741 (0.500, 0.909) |
| CRISP | **0.973 (0.935,1.000)** | **0.746 (0.631, 0.853)** | **0.932 (0.863, 0.986)** | **0.839 (0.667, 0.960)** |

Table S4.17. Comparative performance of models in bile duct subgroup of pan-cancer classification task.

| Cohort | Model | AUROC | Spe (at 95% Sen) | Accuracy | F1 |
| --- | --- | --- | --- | --- | --- |
| ZSH | CHIEF | 0.918 | 0.375 | 0.897 | 0.889 |
| CONCH | 0.913 | 0.500 | 0.897 | 0.870 |
| UNI | 0.918 | 0.750 | 0.862 | 0.867 |
| Virchow | 0.933 | 0.688 | 0.862 | 0.833 |
| Virchow2 | 0.942 | **0.813** | **0.897** | **0.897** |
| CRISP | **0.957** | **0.813** | **0.897** | **0.897** |
| NFH | CHIEF | 0.823 | 0.222 | 0.800 | 0.667 |
| CONCH | 0.956 | 0.694 | 0.920 | 0.857 |
| UNI | 0.853 | 0.417 | 0.840 | 0.733 |
| Virchow | 0.903 | 0.472 | 0.860 | 0.774 |
| Virchow2 | **0.976** | **0.917** | **0.940** | **0.903** |
| CRISP | 0.974 | 0.861 | **0.940** | 0.897 |
| HDGZ | CHIEF | **1.000** | **1.000** | **1.000** | **1.000** |
| CONCH | **1.000** | **1.000** | **1.000** | **1.000** |
| UNI | **1.000** | **1.000** | **1.000** | **1.000** |
| Virchow | **1.000** | **1.000** | **1.000** | **1.000** |
| Virchow2 | **1.000** | **1.000** | **1.000** | **1.000** |
| CRISP | **1.000** | **1.000** | **1.000** | **1.000** |
| Overall | CHIEF | 0.862 (0.776,0.949) | 0.304 (0.196, 0.431) | 0.821 (0.738, 0.905) | 0.746 (0.612, 0.857) |
| CONCH | 0.945 (0.901,0.990) | 0.732 (0.614, 0.850) | 0.869 (0.798, 0.929) | 0.814 (0.700, 0.912) |
| UNI | 0.885 (0.807,0.964) | 0.339 (0.218, 0.464) | 0.833 (0.762, 0.917) | 0.781 (0.655, 0.875) |
| Virchow | 0.933 (0.880,0.986) | 0.625 (0.500, 0.750) | 0.845 (0.762, 0.917) | 0.800 (0.667, 0.892) |
| Virchow2 | 0.958 (0.920,0.995) | 0.821 (0.711, 0.921) | 0.881 (0.810, 0.940) | 0.848 (0.750, 0.931) |
| CRISP | **0.974 (0.947,1.000)** | **0.893 (0.804, 0.977)** | **0.905 (0.833, 0.964)** | **0.875 (0.772, 0.952)** |

Table S4.18. Comparative performance of models in soft tissue subgroup of pan-cancer classification task.

| Cohort | Model | AUROC | Spe (at 95% Sen) | Accuracy | F1 |
| --- | --- | --- | --- | --- | --- |
| ZSH | CHIEF | 0.675 | 0.000 | 0.385 | 0.556 |
| CONCH | 0.775 | 0.400 | 0.769 | 0.824 |
| UNI | 0.800 | 0.200 | 0.846 | 0.875 |
| Virchow | **1.000** | **1.000** | **1.000** | **1.000** |
| Virchow2 | 0.700 | 0.400 | 0.769 | 0.842 |
| CRISP | 0.975 | 0.800 | 0.923 | 0.933 |
| NFH | CHIEF | 0.747 | 0.071 | 0.720 | 0.741 |
| CONCH | 0.818 | 0.214 | 0.880 | 0.842 |
| UNI | 0.877 | 0.286 | 0.840 | 0.833 |
| Virchow | 0.903 | 0.500 | 0.880 | 0.857 |
| Virchow2 | 0.935 | **0.571** | 0.880 | 0.870 |
| CRISP | **0.955** | **0.571** | **0.920** | **0.909** |
| HDGZ | CHIEF | **1.000** | **1.000** | **1.000** | **1.000** |
| CONCH | **1.000** | **1.000** | **1.000** | **1.000** |
| UNI | **1.000** | 0.000 | 0.000 | 0.000 |
| Virchow | **1.000** | **1.000** | **1.000** | **1.000** |
| Virchow2 | **1.000** | **1.000** | **1.000** | **1.000** |
| CRISP | **1.000** | **1.000** | **1.000** | **1.000** |
| Overall | CHIEF | 0.667 (0.491,0.844) | 0.300 (0.111, 0.500) | 0.700 (0.550, 0.825) | 0.700 (0.500, 0.844) |
| CONCH | 0.792 (0.645,0.940) | 0.300 (0.100, 0.500) | 0.800 (0.675, 0.925) | 0.789 (0.625, 0.914) |
| UNI | 0.830 (0.695,0.965) | **0.600 (0.389, 0.810)** | 0.825 (0.700, 0.925) | 0.821 (0.667, 0.933) |
| Virchow | 0.917 (0.832,1.000) | 0.450 (0.227, 0.667) | 0.850 (0.725, 0.950) | 0.857 (0.718, 0.952) |
| Virchow2 | 0.872 (0.762,0.983) | **0.600 (0.389, 0.800)** | 0.850 (0.725, 0.950) | 0.850 (0.710, 0.952) |
| CRISP | **0.935 (0.860,1.000)** | **0.600 (0.391, 0.818)** | **0.900 (0.800, 0.975)** | **0.889 (0.759, 0.977)** |

Table S4.19. Comparative performance of models in liver subgroup of pan-cancer classification task.

| Cohort | Model | AUROC | Spe (at 95% Sen) | Accuracy | F1 |
| --- | --- | --- | --- | --- | --- |
| ZSH | CHIEF | 0.433 | 0.300 | 0.462 | 0.222 |
| CONCH | 0.900 | 0.700 | 0.769 | 0.667 |
| UNI | 0.933 | 0.800 | 0.846 | 0.750 |
| Virchow | 0.700 | 0.200 | 0.846 | 0.667 |
| Virchow2 | 0.833 | 0.700 | 0.769 | 0.667 |
| CRISP | **0.967** | **0.900** | **0.923** | **0.857** |
| NFH | CHIEF | 0.467 | 0.200 | 0.375 | 0.286 |
| CONCH | 0.667 | 0.400 | 0.625 | 0.667 |
| UNI | 0.600 | 0.000 | 0.250 | 0.250 |
| Virchow | 0.733 | 0.600 | 0.750 | 0.750 |
| Virchow2 | **1.000** | **1.000** | **1.000** | **1.000** |
| CRISP | **1.000** | **1.000** | **1.000** | **1.000** |
| HDGZ | CHIEF | **1.000** | **1.000** | **1.000** | **1.000** |
| CONCH | **1.000** | **1.000** | **1.000** | **1.000** |
| UNI | **1.000** | **1.000** | **1.000** | **1.000** |
| Virchow | **1.000** | **1.000** | **1.000** | **1.000** |
| Virchow2 | **1.000** | **1.000** | **1.000** | **1.000** |
| CRISP | **1.000** | **1.000** | **1.000** | **1.000** |
| Overall | CHIEF | 0.500 (0.222,0.778) | 0.062 (0.000, 0.200) | 0.565 (0.348, 0.783) | 0.500 (0.211, 0.741) |
| CONCH | 0.795 (0.587,1.000) | 0.438 (0.176, 0.706) | 0.783 (0.609, 0.957) | 0.667 (0.286, 0.889) |
| UNI | 0.679 (0.342,1.000) | 0.000 (0.000, 0.000) | 0.783 (0.609, 0.913) | 0.667 (0.286, 0.900) |
| Virchow | 0.696 (0.411,0.982) | 0.250 (0.062, 0.467) | 0.826 (0.652, 0.957) | 0.667 (0.250, 0.933) |
| Virchow2 | 0.866 (0.719,1.000) | 0.688 (0.461, 0.909) | 0.783 (0.609, 0.914) | 0.737 (0.444, 0.933) |
| CRISP | **0.946 (0.863,1.000)** | **0.812 (0.615, 1.000)** | **0.870 (0.696, 1.000)** | **0.824 (0.571, 1.000)** |

Table S4.20. Comparative performance of models in pancreas subgroup of pan-cancer classification task.

| Cohort | Model | AUROC | Spe (at 95% Sen) | Accuracy | F1 |
| --- | --- | --- | --- | --- | --- |
| ZSH | CHIEF | **1.000** | **1.000** | **1.000** | **1.000** |
| CONCH | **1.000** | **1.000** | **1.000** | **1.000** |
| UNI | 0.900 | 0.800 | 0.857 | 0.800 |
| Virchow | **1.000** | **1.000** | **1.000** | **1.000** |
| Virchow2 | **1.000** | **1.000** | **1.000** | **1.000** |
| CRISP | **1.000** | **1.000** | **1.000** | **1.000** |
| NFH | CHIEF | 0.894 | 0.584 | 0.856 | 0.851 |
| CONCH | 0.885 | 0.623 | 0.829 | 0.830 |
| UNI | 0.919 | 0.558 | 0.856 | 0.857 |
| Virchow | 0.909 | 0.636 | 0.856 | 0.853 |
| Virchow2 | 0.948 | 0.766 | 0.897 | 0.895 |
| CRISP | **0.980** | **0.857** | **0.932** | **0.929** |
| HDGZ | CHIEF | **1.000** | **1.000** | **1.000** | **1.000** |
| CONCH | **1.000** | **1.000** | **1.000** | **1.000** |
| UNI | **1.000** | **1.000** | **1.000** | **1.000** |
| Virchow | **1.000** | **1.000** | **1.000** | **1.000** |
| Virchow2 | **1.000** | **1.000** | **1.000** | **1.000** |
| CRISP | **1.000** | **1.000** | **1.000** | **1.000** |
| Overall | CHIEF | 0.892 (0.840,0.945) | 0.595 (0.494, 0.703) | 0.854 (0.796, 0.904) | 0.848 (0.778, 0.908) |
| CONCH | 0.892 (0.840,0.943) | 0.655 (0.556, 0.750) | 0.834 (0.771, 0.892) | 0.831 (0.765, 0.889) |
| UNI | 0.913 (0.870,0.957) | 0.560 (0.460, 0.655) | 0.854 (0.790, 0.905) | 0.854 (0.795, 0.908) |
| Virchow | 0.918 (0.873,0.963) | 0.667 (0.567, 0.770) | 0.866 (0.809, 0.917) | 0.861 (0.800, 0.915) |
| Virchow2 | 0.953 (0.925,0.982) | 0.774 (0.689, 0.857) | 0.904 (0.860, 0.943) | 0.901 (0.848, 0.944) |
| CRISP | **0.981 (0.965,0.996)** | **0.857 (0.776, 0.924)** | **0.936 (0.898, 0.968)** | **0.932 (0.887, 0.971)** |

Table S4.21. Comparative performance of models in colorectum subgroup of pan-cancer classification task.

| Cohort | Model | AUROC | Spe (at 95% Sen) | Accuracy | F1 |
| --- | --- | --- | --- | --- | --- |
| ZSH | CHIEF | **1.000** | **1.000** | **1.000** | **1.000** |
| CONCH | **1.000** | **1.000** | **1.000** | **1.000** |
| UNI | **1.000** | **1.000** | **1.000** | **1.000** |
| Virchow | **1.000** | **1.000** | **1.000** | **1.000** |
| Virchow2 | **1.000** | **1.000** | **1.000** | **1.000** |
| CRISP | **1.000** | **1.000** | **1.000** | **1.000** |
| NFH | CHIEF | 0.821 | 0.571 | 0.727 | 0.727 |
| CONCH | 0.893 | 0.714 | 0.818 | 0.800 |
| UNI | **1.000** | **1.000** | **1.000** | **1.000** |
| Virchow | 0.786 | 0.143 | 0.909 | 0.857 |
| Virchow2 | **1.000** | **1.000** | **1.000** | **1.000** |
| CRISP | **1.000** | **1.000** | **1.000** | **1.000** |
| HDGZ | CHIEF | 0.778 | 0.667 | 0.833 | 0.857 |
| CONCH | **1.000** | **1.000** | **1.000** | **1.000** |
| UNI | 0.778 | 0.667 | 0.833 | 0.857 |
| Virchow | 0.889 | 0.667 | 0.833 | 0.857 |
| Virchow2 | **1.000** | **1.000** | **1.000** | **1.000** |
| CRISP | **1.000** | **1.000** | **1.000** | **1.000** |
| Overall | CHIEF | 0.837 (0.653,1.000) | 0.333 (0.118, 0.571) | 0.833 (0.667, 0.958) | 0.778 (0.500, 0.947) |
| CONCH | 0.889 (0.734,1.000) | 0.333 (0.091, 0.588) | 0.875 (0.708, 1.000) | 0.824 (0.545, 1.000) |
| UNI | 0.941 (0.836,1.000) | 0.867 (0.667, 1.000) | 0.917 (0.792, 1.000) | 0.900 (0.727, 1.000) |
| Virchow | 0.844 (0.643,1.000) | 0.133 (0.000, 0.333) | 0.875 (0.750, 1.000) | 0.800 (0.545, 1.000) |
| Virchow2 | 0.978 (0.928,1.000) | 0.800 (0.583, 1.000) | 0.958 (0.875, 1.000) | 0.941 (0.778, 1.000) |
| CRISP | **1.000 (1.000,1.000)** | **1.000 (1.000, 1.000)** | **1.000 (1.000, 1.000)** | **1.000 (1.000, 1.000)** |

Table S4.22. Comparative performance of models in pleura subgroup of pan-cancer classification task.

| Cohort | Model | AUROC | Spe (at 95% Sen) | Accuracy | F1 |
| --- | --- | --- | --- | --- | --- |
| ZSH | CHIEF | 0.778 | 0.667 | 0.750 | 0.667 |
| CONCH | 0.815 | 0.667 | 0.750 | 0.667 |
| UNI | 0.667 | 0.556 | 0.667 | 0.600 |
| Virchow | 0.778 | 0.333 | **0.917** | **0.800** |
| Virchow2 | 0.778 | 0.667 | 0.750 | 0.667 |
| CRISP | **0.889** | **0.667** | 0.750 | 0.667 |
| NFH | CHIEF | 0.702 | 0.198 | 0.746 | 0.441 |
| CONCH | 0.933 | **0.755** | 0.869 | 0.721 |
| UNI | 0.835 | 0.302 | 0.831 | 0.633 |
| Virchow | 0.873 | 0.358 | 0.869 | 0.691 |
| Virchow2 | 0.925 | 0.330 | 0.923 | 0.815 |
| CRISP | **0.934** | 0.566 | **0.938** | **0.846** |
| HDGZ | CHIEF | 0.667 | 0.000 | 0.286 | 0.286 |
| CONCH | 0.583 | 0.000 | 0.286 | 0.286 |
| UNI | 0.667 | 0.000 | **0.857** | 0.800 |
| Virchow | 0.833 | 0.500 | **0.857** | 0.800 |
| Virchow2 | 0.667 | 0.000 | **0.857** | 0.800 |
| CRISP | **0.917** | **0.750** | **0.857** | **0.857** |
| Overall | CHIEF | 0.673 (0.560,0.786) | 0.160 (0.097, 0.230) | 0.745 (0.678, 0.812) | 0.441 (0.290, 0.583) |
| CONCH | 0.873 (0.783,0.962) | 0.042 (0.009, 0.082) | 0.852 (0.799, 0.906) | 0.703 (0.565, 0.810) |
| UNI | 0.803 (0.705,0.900) | 0.286 (0.207, 0.374) | 0.805 (0.745, 0.866) | 0.613 (0.473, 0.738) |
| Virchow | 0.836 (0.745,0.928) | 0.235 (0.162, 0.314) | 0.852 (0.792, 0.899) | 0.667 (0.522, 0.782) |
| Virchow2 | 0.890 (0.804,0.977) | 0.294 (0.218, 0.371) | 0.893 (0.839, 0.940) | 0.771 (0.648, 0.875) |
| CRISP | **0.914 (0.841,0.987)** | **0.571 (0.478, 0.664)** | **0.919 (0.872, 0.960)** | **0.800 (0.679, 0.900)** |

Table S4.23. Comparative performance of models in else subgroup of pan-cancer classification task.

| Cohort | Model | AUROC | Spe (at 95% Sen) | Accuracy | F1 |
| --- | --- | --- | --- | --- | --- |
| SYCC | CHIEF | 0.961 (0.944,0.978) | 0.821 (0.766, 0.870) | 0.917 (0.893, 0.942) | 0.927 (0.899, 0.948) |
| CONCH | 0.986 (0.977,0.995) | 0.954 (0.921, 0.980) | 0.953 (0.933, 0.971) | 0.957 (0.936, 0.974) |
| UNI | 0.982 (0.971,0.993) | 0.928 (0.891, 0.962) | 0.958 (0.938, 0.975) | 0.962 (0.944, 0.977) |
| Virchow | 0.982 (0.972,0.993) | 0.944 (0.909, 0.974) | 0.962 (0.942, 0.980) | 0.966 (0.948, 0.982) |
| Virchow2 | 0.992 (0.985,0.998) | **0.995 (0.984, 1.000)** | **0.971 (0.955, 0.984)** | **0.974 (0.958, 0.987)** |
| CRISP | **0.993 (0.989,0.998)** | 0.985 (0.964, 1.000) | 0.969 (0.951, 0.984) | 0.972 (0.956, 0.986) |
| ZSH | CHIEF | 0.775 (0.703,0.848) | 0.220 (0.153, 0.297) | 0.680 (0.613, 0.747) | 0.627 (0.532, 0.705) |
| CONCH | 0.857 (0.794,0.920) | 0.303 (0.229, 0.389) | 0.825 (0.768, 0.876) | 0.730 (0.639, 0.809) |
| UNI | 0.899 (0.847,0.952) | 0.417 (0.333, 0.504) | 0.856 (0.804, 0.897) | 0.791 (0.714, 0.859) |
| Virchow | 0.817 (0.746,0.888) | 0.136 (0.083, 0.199) | 0.799 (0.742, 0.851) | 0.698 (0.600, 0.781) |
| Virchow2 | 0.916 (0.873,0.959) | 0.530 (0.444, 0.609) | 0.887 (0.840, 0.933) | 0.804 (0.716, 0.879) |
| CRISP | **0.974 (0.956,0.993)** | **0.856 (0.792, 0.910)** | **0.912 (0.871, 0.948)** | **0.872 (0.807, 0.930)** |
| NFH | CHIEF | 0.906 (0.889,0.923) | 0.548 (0.502, 0.599) | 0.808 (0.786, 0.832) | 0.834 (0.811, 0.856) |
| CONCH | 0.731 (0.701,0.761) | 0.098 (0.070, 0.127) | 0.676 (0.650, 0.705) | 0.702 (0.672, 0.731) |
| UNI | 0.923 (0.908,0.938) | 0.622 (0.576, 0.672) | 0.829 (0.806, 0.851) | 0.853 (0.833, 0.872) |
| Virchow | 0.906 (0.889,0.924) | 0.405 (0.358, 0.451) | 0.835 (0.813, 0.857) | 0.862 (0.841, 0.882) |
| Virchow2 | 0.975 (0.967,0.982) | 0.845 (0.807, 0.880) | 0.913 (0.895, 0.929) | 0.928 (0.913, 0.942) |
| CRISP | **0.983 (0.977,0.989)** | **0.916 (0.891, 0.941)** | **0.938 (0.923, 0.951)** | **0.950 (0.938, 0.962)** |
| HDGZ | CHIEF | 0.781 (0.687,0.874) | 0.315 (0.192, 0.462) | 0.750 (0.656, 0.833) | 0.707 (0.582, 0.814) |
| CONCH | 0.831 (0.737,0.925) | 0.111 (0.036, 0.204) | 0.833 (0.760, 0.906) | 0.789 (0.679, 0.880) |
| UNI | 0.913 (0.851,0.975) | 0.611 (0.471, 0.741) | 0.875 (0.812, 0.938) | 0.854 (0.758, 0.925) |
| Virchow | 0.848 (0.766,0.931) | 0.370 (0.245, 0.508) | 0.823 (0.740, 0.896) | 0.779 (0.667, 0.867) |
| Virchow2 | 0.925 (0.865,0.984) | 0.500 (0.370, 0.640) | 0.896 (0.833, 0.948) | 0.875 (0.789, 0.946) |
| CRISP | **0.963 (0.928,0.997)** | **0.741 (0.622, 0.852)** | **0.917 (0.854, 0.969)** | **0.900 (0.827, 0.960)** |
| Overall | CHIEF | 0.896 (0.882,0.910) | 0.532 (0.496, 0.569) | 0.812 (0.794, 0.829) | 0.829 (0.812, 0.846) |
| CONCH | 0.830 (0.812,0.848) | 0.296 (0.265, 0.329) | 0.756 (0.736, 0.775) | 0.763 (0.742, 0.784) |
| UNI | 0.939 (0.928,0.949) | 0.657 (0.626, 0.689) | 0.864 (0.847, 0.879) | 0.875 (0.861, 0.890) |
| Virchow | 0.919 (0.906,0.931) | 0.506 (0.468, 0.542) | 0.852 (0.836, 0.868) | 0.866 (0.851, 0.882) |
| Virchow2 | 0.969 (0.963,0.976) | 0.816 (0.789, 0.841) | 0.908 (0.896, 0.921) | 0.916 (0.903, 0.928) |
| CRISP | **0.983 (0.978,0.987)** | **0.907 (0.887, 0.926)** | **0.934 (0.923, 0.946)** | **0.941 (0.931, 0.951)** |

Table S4.24. Comparative performance of models in rare cancers of pan-cancer classification task.

| Cohort | Model | AUROC | Spe (at 95% Sen) | Accuracy | F1 |
| --- | --- | --- | --- | --- | --- |
| SYCC | CHIEF | 0.949 (0.930,0.968) | 0.805 (0.760, 0.845) | 0.900 (0.875, 0.924) | 0.880 (0.848, 0.908) |
| CONCH | 0.968 (0.955,0.981) | 0.817 (0.776, 0.857) | 0.917 (0.895, 0.939) | 0.901 (0.874, 0.929) |
| UNI | 0.976 (0.966,0.986) | 0.850 (0.809, 0.886) | 0.927 (0.905, 0.949) | 0.913 (0.886, 0.937) |
| Virchow | 0.972 (0.958,0.985) | 0.900 (0.868, 0.929) | 0.932 (0.912, 0.951) | 0.922 (0.898, 0.947) |
| Virchow2 | 0.984 (0.975,0.992) | 0.882 (0.845, 0.915) | **0.954 (0.936, 0.969)** | **0.944 (0.922, 0.964)** |
| CRISP | **0.987 (0.979,0.994)** | **0.909 (0.878, 0.938)** | 0.951 (0.932, 0.968) | 0.941 (0.918, 0.960) |
| ZSH | CHIEF | 0.753 (0.727,0.778) | 0.247 (0.221, 0.276) | 0.702 (0.676, 0.726) | 0.619 (0.589, 0.651) |
| CONCH | 0.889 (0.871,0.907) | 0.442 (0.413, 0.472) | 0.838 (0.820, 0.857) | 0.769 (0.739, 0.799) |
| UNI | 0.872 (0.853,0.891) | 0.458 (0.426, 0.489) | 0.793 (0.771, 0.814) | 0.733 (0.703, 0.761) |
| Virchow | 0.741 (0.716,0.766) | 0.356 (0.327, 0.389) | 0.679 (0.657, 0.705) | 0.657 (0.628, 0.683) |
| Virchow2 | 0.874 (0.856,0.892) | 0.501 (0.467, 0.531) | 0.785 (0.764, 0.806) | 0.744 (0.717, 0.773) |
| CRISP | **0.951 (0.940,0.962)** | **0.716 (0.684, 0.745)** | **0.890 (0.873, 0.906)** | **0.855 (0.832, 0.877)** |
| NFH | CHIEF | 0.796 (0.777,0.815) | 0.281 (0.258, 0.305) | 0.753 (0.734, 0.771) | 0.688 (0.663, 0.711) |
| CONCH | 0.881 (0.866,0.896) | 0.382 (0.356, 0.407) | 0.831 (0.815, 0.846) | 0.773 (0.752, 0.794) |
| UNI | 0.879 (0.864,0.894) | 0.426 (0.399, 0.454) | 0.825 (0.810, 0.840) | 0.777 (0.754, 0.798) |
| Virchow | 0.867 (0.851,0.883) | 0.350 (0.324, 0.374) | 0.810 (0.794, 0.826) | 0.753 (0.732, 0.775) |
| Virchow2 | 0.935 (0.924,0.945) | 0.647 (0.621, 0.671) | 0.883 (0.871, 0.897) | 0.849 (0.830, 0.866) |
| CRISP | **0.966 (0.959,0.973)** | **0.848 (0.829, 0.866)** | **0.911 (0.900, 0.923)** | **0.890 (0.875, 0.905)** |
| HDGZ | CHIEF | 0.752 (0.717,0.787) | 0.144 (0.106, 0.184) | 0.712 (0.679, 0.744) | 0.746 (0.712, 0.779) |
| CONCH | 0.791 (0.758,0.823) | 0.158 (0.121, 0.198) | 0.735 (0.703, 0.766) | 0.727 (0.690, 0.760) |
| UNI | 0.907 (0.884,0.929) | 0.560 (0.507, 0.608) | 0.850 (0.823, 0.876) | 0.856 (0.828, 0.881) |
| Virchow | 0.845 (0.817,0.873) | 0.302 (0.256, 0.352) | 0.784 (0.755, 0.812) | 0.786 (0.754, 0.819) |
| Virchow2 | 0.861 (0.835,0.887) | 0.368 (0.319, 0.417) | 0.792 (0.762, 0.820) | 0.787 (0.755, 0.820) |
| CRISP | **0.960 (0.947,0.974)** | **0.784 (0.738, 0.824)** | **0.913 (0.891, 0.932)** | **0.914 (0.893, 0.934)** |
| Overall | CHIEF | 0.795 (0.783,0.807) | 0.278 (0.263, 0.293) | 0.728 (0.717, 0.741) | 0.696 (0.681, 0.711) |
| CONCH | 0.871 (0.861,0.881) | 0.332 (0.316, 0.347) | 0.807 (0.796, 0.818) | 0.764 (0.749, 0.779) |
| UNI | 0.889 (0.879,0.898) | 0.458 (0.442, 0.476) | 0.821 (0.811, 0.833) | 0.783 (0.770, 0.797) |
| Virchow | 0.830 (0.819,0.842) | 0.336 (0.320, 0.352) | 0.766 (0.755, 0.777) | 0.735 (0.720, 0.750) |
| Virchow2 | 0.905 (0.897,0.914) | 0.539 (0.520, 0.558) | 0.832 (0.822, 0.842) | 0.801 (0.787, 0.813) |
| CRISP | **0.962 (0.958,0.967)** | **0.798 (0.785, 0.813)** | **0.909 (0.901, 0.917)** | **0.889 (0.879, 0.899)** |

Table S4.25. Comparative performance of models in common cancers of pan-cancer classification task.

| Cohort | Model | AUROC | Spe (at 95% Sen) | Accuracy | F1 |
| --- | --- | --- | --- | --- | --- |
| ZSH | CHIEF | 0.832 (0.741,0.924) | 0.143 (0.078, 0.219) | 0.770 (0.690, 0.841) | 0.613 (0.484, 0.730) |
| CONCH | 0.862 (0.778,0.945) | 0.367 (0.271, 0.465) | 0.849 (0.786, 0.913) | 0.678 (0.528, 0.806) |
| UNI | 0.876 (0.805,0.946) | 0.490 (0.389, 0.590) | 0.778 (0.698, 0.849) | 0.641 (0.487, 0.759) |
| Virchow | 0.819 (0.730,0.908) | 0.378 (0.286, 0.475) | 0.786 (0.714, 0.857) | 0.597 (0.426, 0.732) |
| Virchow2 | 0.842 (0.763,0.921) | 0.429 (0.333, 0.524) | 0.786 (0.706, 0.857) | 0.609 (0.453, 0.732) |
| CRISP | **0.950 (0.906,0.995)** | **0.786 (0.703, 0.859)** | **0.881 (0.825, 0.937)** | **0.769 (0.636, 0.871)** |
| NFH | CHIEF | 0.772 (0.711,0.833) | 0.275 (0.217, 0.328) | 0.762 (0.710, 0.809) | 0.526 (0.427, 0.610) |
| CONCH | 0.893 (0.856,0.930) | 0.635 (0.576, 0.697) | 0.802 (0.756, 0.842) | 0.677 (0.600, 0.749) |
| UNI | 0.852 (0.801,0.902) | 0.391 (0.333, 0.452) | 0.789 (0.742, 0.835) | 0.648 (0.565, 0.724) |
| Virchow | 0.857 (0.803,0.910) | 0.339 (0.279, 0.403) | 0.785 (0.739, 0.828) | 0.652 (0.564, 0.726) |
| Virchow2 | 0.932 (0.898,0.967) | 0.764 (0.706, 0.819) | 0.809 (0.762, 0.851) | 0.698 (0.620, 0.763) |
| CRISP | **0.963 (0.931,0.995)** | **0.820 (0.770, 0.864)** | **0.934 (0.908, 0.960)** | **0.867 (0.803, 0.919)** |
| HDGZ | CHIEF | 0.707 (0.478,0.936) | 0.045 (0.000, 0.167) | 0.677 (0.516, 0.839) | 0.583 (0.300, 0.788) |
| CONCH | 0.808 (0.557,1.000) | 0.091 (0.000, 0.211) | 0.935 (0.839, 1.000) | 0.875 (0.615, 1.000) |
| UNI | 0.874 (0.666,1.000) | 0.045 (0.000, 0.150) | 0.935 (0.839, 1.000) | 0.889 (0.667, 1.000) |
| Virchow | 0.949 (0.864,1.000) | 0.636 (0.416, 0.833) | 0.903 (0.774, 1.000) | 0.842 (0.615, 1.000) |
| Virchow2 | 0.909 (0.730,1.000) | 0.182 (0.043, 0.353) | 0.968 (0.903, 1.000) | 0.941 (0.769, 1.000) |
| CRISP | **0.955 (0.883,1.000)** | **0.727 (0.545, 0.905)** | **0.935 (0.839, 1.000)** | **0.875 (0.615, 1.000)** |
| Overall | CHIEF | 0.760 (0.707,0.812) | 0.232 (0.189, 0.278) | 0.735 (0.693, 0.776) | 0.534 (0.460, 0.600) |
| CONCH | 0.878 (0.840,0.916) | 0.510 (0.458, 0.560) | 0.796 (0.759, 0.830) | 0.662 (0.594, 0.724) |
| UNI | 0.854 (0.812,0.897) | 0.351 (0.297, 0.400) | 0.780 (0.743, 0.817) | 0.643 (0.577, 0.706) |
| Virchow | 0.846 (0.803,0.889) | 0.357 (0.307, 0.406) | 0.774 (0.735, 0.807) | 0.631 (0.564, 0.690) |
| Virchow2 | 0.900 (0.866,0.934) | 0.666 (0.616, 0.715) | 0.820 (0.780, 0.852) | 0.680 (0.609, 0.742) |
| CRISP | **0.955 (0.930,0.980)** | **0.759 (0.715, 0.805)** | **0.937 (0.913, 0.959)** | **0.860 (0.808, 0.907)** |

Table S4.26. Comparative performance of models in unseen rare cancers of pan-cancer classification task.

| Cohort | Model | AUROC | Spe (at 95% Sen) | Accuracy | F1 |
| --- | --- | --- | --- | --- | --- |
| ZSH | CHIEF | 0.778 (0.744,0.811) | 0.278 (0.241, 0.314) | 0.709 (0.675, 0.738) | 0.618 (0.572, 0.660) |
| CONCH | 0.846 (0.815,0.877) | 0.314 (0.278, 0.349) | 0.835 (0.809, 0.858) | 0.704 (0.657, 0.753) |
| UNI | 0.845 (0.815,0.875) | 0.368 (0.329, 0.406) | 0.744 (0.714, 0.773) | 0.660 (0.617, 0.704) |
| Virchow | 0.671 (0.634,0.709) | 0.193 (0.161, 0.226) | 0.599 (0.567, 0.632) | 0.539 (0.491, 0.582) |
| Virchow2 | 0.841 (0.812,0.870) | 0.382 (0.339, 0.418) | 0.725 (0.695, 0.755) | 0.653 (0.607, 0.693) |
| CRISP | **0.940 (0.924,0.957)** | **0.646 (0.606, 0.686)** | **0.898 (0.875, 0.918)** | **0.827 (0.790, 0.862)** |
| NFH | CHIEF | 0.817 (0.785,0.849) | 0.362 (0.323, 0.400) | 0.780 (0.751, 0.807) | 0.635 (0.580, 0.682) |
| CONCH | 0.869 (0.839,0.899) | 0.310 (0.275, 0.351) | 0.824 (0.799, 0.853) | 0.706 (0.658, 0.748) |
| UNI | 0.876 (0.849,0.904) | 0.456 (0.417, 0.494) | 0.806 (0.780, 0.832) | 0.702 (0.658, 0.745) |
| Virchow | 0.851 (0.819,0.883) | 0.262 (0.229, 0.299) | 0.753 (0.725, 0.783) | 0.643 (0.601, 0.690) |
| Virchow2 | 0.923 (0.901,0.945) | 0.520 (0.477, 0.560) | 0.854 (0.828, 0.878) | 0.762 (0.717, 0.806) |
| CRISP | **0.953 (0.935,0.971)** | **0.758 (0.722, 0.792)** | **0.894 (0.873, 0.915)** | **0.820 (0.783, 0.859)** |
| HDGZ | CHIEF | 0.701 (0.564,0.838) | 0.169 (0.095, 0.245) | 0.682 (0.591, 0.764) | 0.462 (0.302, 0.603) |
| CONCH | 0.763 (0.631,0.895) | 0.101 (0.045, 0.172) | 0.764 (0.691, 0.836) | 0.536 (0.367, 0.679) |
| UNI | 0.845 (0.741,0.948) | 0.685 (0.576, 0.778) | 0.736 (0.655, 0.818) | 0.580 (0.441, 0.706) |
| Virchow | 0.849 (0.762,0.935) | 0.640 (0.542, 0.733) | 0.700 (0.609, 0.782) | 0.548 (0.393, 0.676) |
| Virchow2 | 0.892 (0.802,0.983) | **0.775 (0.689, 0.859)** | 0.809 (0.727, 0.882) | 0.656 (0.500, 0.776) |
| CRISP | **0.929 (0.868,0.990)** | 0.685 (0.593, 0.781) | **0.936 (0.891, 0.973)** | **0.821 (0.667, 0.936)** |
| Overall | CHIEF | 0.774 (0.751,0.797) | 0.281 (0.255, 0.306) | 0.679 (0.656, 0.701) | 0.583 (0.551, 0.614) |
| CONCH | 0.854 (0.833,0.876) | 0.301 (0.278, 0.326) | 0.804 (0.785, 0.823) | 0.686 (0.653, 0.717) |
| UNI | 0.852 (0.832,0.873) | 0.366 (0.339, 0.393) | 0.741 (0.720, 0.760) | 0.652 (0.620, 0.678) |
| Virchow | 0.774 (0.751,0.798) | 0.272 (0.245, 0.295) | 0.665 (0.644, 0.687) | 0.585 (0.553, 0.613) |
| Virchow2 | 0.880 (0.863,0.898) | 0.454 (0.428, 0.483) | 0.797 (0.778, 0.815) | 0.687 (0.655, 0.716) |
| CRISP | **0.946 (0.934,0.958)** | **0.702 (0.676, 0.726)** | **0.880 (0.864, 0.894)** | **0.802 (0.777, 0.827)** |

Table S4.27. Comparative performance of models in unseen sites of pan-cancer classification task.

| Cohort | Model | AUROC | Spe (at 95% Sen) | Accuracy | F1 |
| --- | --- | --- | --- | --- | --- |
| SYCC | CHIEF | 0.954 (0.941,0.967) | 0.811 (0.778, 0.844) | 0.903 (0.882, 0.921) | 0.897 (0.876, 0.917) |
| CONCH | 0.976 (0.969,0.984) | 0.850 (0.820, 0.880) | 0.932 (0.917, 0.947) | 0.928 (0.911, 0.943) |
| UNI | 0.978 (0.970,0.986) | 0.880 (0.850, 0.907) | 0.939 (0.924, 0.955) | 0.937 (0.919, 0.951) |
| Virchow | 0.976 (0.967,0.985) | 0.916 (0.892, 0.939) | 0.945 (0.932, 0.959) | 0.942 (0.928, 0.956) |
| Virchow2 | 0.988 (0.982,0.993) | 0.923 (0.899, 0.945) | **0.958 (0.945, 0.970)** | **0.955 (0.941, 0.967)** |
| CRISP | **0.990 (0.985,0.994)** | **0.940 (0.919, 0.959)** | 0.957 (0.943, 0.969) | 0.954 (0.941, 0.967) |
| ZSH | CHIEF | 0.783 (0.752,0.814) | 0.255 (0.217, 0.292) | 0.726 (0.697, 0.758) | 0.690 (0.650, 0.725) |
| CONCH | 0.916 (0.896,0.935) | 0.553 (0.510, 0.601) | 0.831 (0.806, 0.855) | 0.813 (0.781, 0.844) |
| UNI | 0.901 (0.880,0.923) | 0.514 (0.472, 0.556) | 0.825 (0.801, 0.850) | 0.802 (0.771, 0.832) |
| Virchow | 0.884 (0.861,0.908) | 0.432 (0.388, 0.473) | 0.822 (0.797, 0.846) | 0.789 (0.756, 0.821) |
| Virchow2 | 0.923 (0.905,0.941) | 0.658 (0.616, 0.703) | 0.855 (0.831, 0.878) | 0.835 (0.804, 0.862) |
| CRISP | **0.965 (0.953,0.977)** | **0.819 (0.786, 0.855)** | **0.921 (0.902, 0.940)** | **0.906 (0.883, 0.927)** |
| NFH | CHIEF | 0.844 (0.829,0.859) | 0.358 (0.330, 0.385) | 0.771 (0.755, 0.788) | 0.776 (0.758, 0.794) |
| CONCH | 0.784 (0.767,0.802) | 0.143 (0.123, 0.162) | 0.715 (0.697, 0.732) | 0.675 (0.652, 0.698) |
| UNI | 0.904 (0.892,0.916) | 0.498 (0.470, 0.528) | 0.841 (0.826, 0.854) | 0.844 (0.830, 0.859) |
| Virchow | 0.891 (0.879,0.904) | 0.410 (0.382, 0.439) | 0.816 (0.801, 0.832) | 0.812 (0.794, 0.828) |
| Virchow2 | 0.957 (0.949,0.964) | 0.746 (0.719, 0.772) | 0.902 (0.890, 0.913) | 0.906 (0.895, 0.918) |
| CRISP | **0.975 (0.970,0.981)** | **0.893 (0.875, 0.910)** | **0.927 (0.917, 0.936)** | **0.932 (0.922, 0.941)** |
| HDGZ | CHIEF | 0.765 (0.730,0.799) | 0.150 (0.114, 0.189) | 0.727 (0.696, 0.759) | 0.768 (0.735, 0.796) |
| CONCH | 0.800 (0.768,0.832) | 0.150 (0.113, 0.193) | 0.741 (0.710, 0.771) | 0.737 (0.700, 0.772) |
| UNI | 0.913 (0.891,0.934) | 0.528 (0.473, 0.585) | 0.856 (0.829, 0.879) | 0.868 (0.845, 0.892) |
| Virchow | 0.856 (0.829,0.883) | 0.301 (0.252, 0.348) | 0.794 (0.764, 0.822) | 0.808 (0.776, 0.836) |
| Virchow2 | 0.871 (0.846,0.896) | 0.393 (0.341, 0.446) | 0.796 (0.767, 0.824) | 0.804 (0.772, 0.836) |
| CRISP | **0.965 (0.952,0.977)** | **0.801 (0.755, 0.842)** | **0.917 (0.897, 0.936)** | **0.923 (0.903, 0.941)** |
| Overall | CHIEF | 0.846 (0.835,0.856) | 0.370 (0.352, 0.389) | 0.775 (0.763, 0.787) | 0.775 (0.763, 0.789) |
| CONCH | 0.856 (0.846,0.866) | 0.336 (0.319, 0.355) | 0.778 (0.767, 0.789) | 0.766 (0.753, 0.779) |
| UNI | 0.917 (0.909,0.924) | 0.556 (0.536, 0.576) | 0.848 (0.838, 0.857) | 0.846 (0.835, 0.855) |
| Virchow | 0.900 (0.892,0.909) | 0.441 (0.423, 0.462) | 0.830 (0.821, 0.841) | 0.826 (0.815, 0.838) |
| Virchow2 | 0.946 (0.940,0.952) | 0.672 (0.654, 0.691) | 0.884 (0.875, 0.891) | 0.883 (0.873, 0.892) |
| CRISP | **0.974 (0.971,0.978)** | **0.884 (0.872, 0.896)** | **0.928 (0.921, 0.935)** | **0.929 (0.921, 0.935)** |

Table S4.28. Comparative performance of models in seen sites of pan-cancer classification task.

| Model | AUROC | Spe (at 90% Sen) | Spe (at 95% Sen) | Accuracy | F1 |
| --- | --- | --- | --- | --- | --- |
| CHIEF | 0.776 (0.752, 0.799) | 0.367 (0.333, 0.408) | 0.250 (0.214, 0.284) | 0.723 (0.704, 0.741) | 0.784 (0.766, 0.801) |
| CONCH | 0.833 (0.815, 0.850) | 0.488 (0.448, 0.527) | 0.326 (0.288, 0.361) | 0.733 (0.713, 0.754) | 0.791 (0.773, 0.807) |
| UNI | 0.867 (0.848, 0.886) | 0.590 (0.549, 0.627) | 0.390 (0.352, 0.430) | 0.822 (0.806, 0.838) | 0.868 (0.855, 0.881) |
| Virchow | 0.798 (0.779, 0.816) | 0.329 (0.291, 0.367) | 0.153 (0.126, 0.184) | 0.676 (0.656, 0.696) | 0.713 (0.693, 0.734) |
| Virchow2 | 0.916 (0.904, 0.927) | 0.602 (0.564, 0.642) | 0.495 (0.452, 0.538) | 0.820 (0.804, 0.837) | 0.861 (0.846, 0.874) |
| CRISP | **0.975 (0.969, 0.981)** | **0.972 (0.957, 0.985)** | **0.809 (0.777, 0.839)** | **0.926 (0.915, 0.938)** | **0.947 (0.938, 0.955)** |

Table S5.1. Comparison of overall model performance in the prospective cohort.

| Task | Model | AUROC | Spe (at 90% Sen) | Spe (at 95% Sen) | Accuracy | F1 |
| --- | --- | --- | --- | --- | --- | --- |
| PNBM | CHIEF | 0.884 (0.845, 0.923) | 0.576 (0.458, 0.692) | 0.394 (0.286, 0.513) | 0.777 (0.734, 0.820) | 0.845 (0.809, 0.879) |
| CONCH | 0.884 (0.846, 0.923) | 0.667 (0.551, 0.778) | 0.333 (0.222, 0.453) | 0.806 (0.769, 0.849) | 0.870 (0.837, 0.899) |
| UNI | 0.960 (0.942, 0.979) | 0.939 (0.877, 0.986) | 0.667 (0.547, 0.783) | 0.917 (0.889, 0.943) | 0.947 (0.928, 0.965) |
| Virchow | 0.888 (0.850, 0.926) | 0.636 (0.516, 0.759) | 0.303 (0.197, 0.417) | 0.806 (0.763, 0.843) | 0.868 (0.834, 0.898) |
| Virchow2 | 0.960 (0.940, 0.980) | 0.864 (0.776, 0.938) | 0.697 (0.580, 0.803) | 0.891 (0.857, 0.920) | 0.929 (0.906, 0.951) |
| CRISP | **0.991 (0.981, 1.000)** | **0.985 (0.951, 1.000)** | **0.955 (0.902, 1.000)** | **0.951 (0.929, 0.971)** | **0.969 (0.954, 0.984)** |
| TNBM | CHIEF | 0.943 (0.928, 0.958) | 0.857 (0.797, 0.912) | 0.586 (0.504, 0.667) | 0.878 (0.858, 0.897) | 0.925 (0.913, 0.937) |
| CONCH | 0.943 (0.930, 0.957) | 0.864 (0.810, 0.918) | 0.586 (0.500, 0.672) | 0.867 (0.846, 0.887) | 0.918 (0.904, 0.930) |
| UNI | 0.954 (0.942, 0.965) | 0.921 (0.873, 0.964) | 0.521 (0.439, 0.602) | 0.884 (0.864, 0.904) | 0.929 (0.916, 0.942) |
| Virchow | 0.947 (0.934, 0.960) | 0.821 (0.759, 0.884) | 0.593 (0.509, 0.669) | 0.879 (0.859, 0.898) | 0.925 (0.913, 0.939) |
| Virchow2 | 0.941 (0.927, 0.954) | 0.771 (0.691, 0.841) | 0.479 (0.401, 0.562) | 0.852 (0.830, 0.874) | 0.907 (0.892, 0.921) |
| CRISP | **0.972 (0.962, 0.983)** | **0.986 (0.964, 1.000)** | **0.779 (0.706, 0.846)** | **0.924 (0.907, 0.939)** | **0.954 (0.944, 0.963)** |
| BNBM | CHIEF | 0.890 (0.827, 0.953) | 0.635 (0.532, 0.747) | 0.527 (0.414, 0.638) | 0.827 (0.750, 0.894) | 0.719 (0.596, 0.831) |
| CONCH | 0.912 (0.853, 0.970) | 0.649 (0.536, 0.753) | 0.459 (0.342, 0.563) | 0.837 (0.760, 0.904) | 0.746 (0.618, 0.847) |
| UNI | 0.962 (0.925, 0.999) | 0.892 (0.819, 0.956) | 0.527 (0.409, 0.645) | 0.904 (0.846, 0.962) | 0.848 (0.739, 0.933) |
| Virchow | 0.940 (0.895, 0.985) | 0.824 (0.727, 0.915) | 0.595 (0.480, 0.704) | 0.856 (0.788, 0.923) | 0.789 (0.676, 0.881) |
| Virchow2 | 0.935 (0.888, 0.981) | 0.770 (0.667, 0.872) | 0.581 (0.468, 0.691) | 0.865 (0.798, 0.933) | 0.794 (0.667, 0.886) |
| CRISP | **0.981 (0.961, 1.000)** | **0.946 (0.885, 0.987)** | **0.919 (0.855, 0.974)** | **0.942 (0.885, 0.981)** | **0.909 (0.824, 0.973)** |
| CLMD | CHIEF | 0.939 (0.912, 0.967) | 0.755 (0.667, 0.836) | 0.461 (0.371, 0.558) | 0.887 (0.850, 0.921) | 0.903 (0.863, 0.936) |
| CONCH | 0.953 (0.925, 0.980) | 0.951 (0.904, 0.989) | 0.422 (0.321, 0.515) | 0.932 (0.898, 0.962) | 0.942 (0.912, 0.966) |
| UNI | 0.978 (0.961, 0.996) | **1.000 (1.000, 1.000)** | 0.902 (0.843, 0.958) | 0.955 (0.929, 0.977) | 0.962 (0.939, 0.981) |
| Virchow | 0.979 (0.962, 0.995) | 0.971 (0.933, 1.000) | 0.931 (0.878, 0.980) | 0.944 (0.914, 0.966) | 0.953 (0.925, 0.974) |
| Virchow2 | 0.981 (0.965, 0.996) | **1.000 (1.000, 1.000)** | **1.000 (1.000, 1.000)** | **0.974 (0.955, 0.989)** | **0.978 (0.960, 0.992)** |
| CRISP | **0.994 (0.988, 0.999)** | **1.000 (1.000, 1.000)** | 0.951 (0.900, 0.989) | 0.962 (0.936, 0.981) | 0.969 (0.949, 0.986) |
| SLMD | CHIEF | 0.962 (0.932, 0.992) | 0.755 (0.678, 0.835) | 0.609 (0.519, 0.700) | 0.925 (0.887, 0.962) | 0.878 (0.800, 0.935) |
| CONCH | 0.880 (0.815, 0.945) | 0.418 (0.325, 0.510) | 0.336 (0.250, 0.430) | 0.893 (0.843, 0.931) | 0.800 (0.699, 0.886) |
| UNI | 0.926 (0.880, 0.972) | 0.664 (0.573, 0.752) | 0.436 (0.345, 0.530) | 0.862 (0.811, 0.918) | 0.788 (0.696, 0.871) |
| Virchow | 0.946 (0.911, 0.981) | 0.818 (0.746, 0.891) | 0.582 (0.496, 0.669) | 0.893 (0.843, 0.937) | 0.838 (0.759, 0.908) |
| Virchow2 | 0.930 (0.886, 0.973) | 0.755 (0.670, 0.833) | 0.645 (0.556, 0.735) | 0.887 (0.836, 0.931) | 0.816 (0.724, 0.889) |
| CRISP | **0.985 (0.972, 0.998)** | **0.918 (0.862, 0.963)** | **0.855 (0.786, 0.916)** | **0.943 (0.906, 0.975)** | **0.909 (0.845, 0.964)** |
| BSMA | CHIEF | 0.782 (0.703, 0.861) | 0.443 (0.341, 0.552) | 0.398 (0.298, 0.507) | 0.719 (0.641, 0.797) | 0.654 (0.544, 0.763) |
| CONCH | 0.746 (0.634, 0.859) | 0.114 (0.052, 0.183) | 0.091 (0.034, 0.156) | 0.844 (0.773, 0.906) | 0.706 (0.576, 0.821) |
| UNI | 0.836 (0.762, 0.910) | 0.455 (0.349, 0.560) | 0.375 (0.279, 0.478) | 0.742 (0.664, 0.820) | 0.667 (0.555, 0.757) |
| Virchow | 0.891 (0.828, 0.954) | 0.568 (0.473, 0.667) | 0.386 (0.287, 0.494) | 0.875 (0.812, 0.930) | 0.800 (0.703, 0.881) |
| Virchow2 | 0.940 (0.895, 0.985) | 0.784 (0.690, 0.872) | 0.489 (0.382, 0.598) | 0.906 (0.859, 0.953) | 0.846 (0.746, 0.923) |
| CRISP | **0.973 (0.944, 1.000)** | **0.898 (0.828, 0.953)** | **0.739 (0.641, 0.826)** | **0.938 (0.891, 0.977)** | **0.900 (0.823, 0.961)** |

Table S5.2. Comparison of model performance across tasks in the prospective cohort.

| **Histotechnologist Group** | **Cases** | **AUROC** |
| --- | --- | --- |
| H1 | 8 | 1.000 |
| H2 | 19 | 1.000 |
| H3 | 30 | 1.000 |
| H4 | 52 | 1.000 |
| H5 | 16 | 1.000 |
| H6 | 2 | 1.000 |
| H7 | 5 | 1.000 |
| H8 | 113 | 0.996 |
| H9 | 191 | 0.995 |
| H10 | 100 | 0.994 |
| H11 | 80 | 0.993 |
| H12 | 110 | 0.992 |
| H13 | 89 | 0.991 |
| H14 | 78 | 0.991 |
| H15 | 82 | 0.990 |
| H16 | 27 | 0.986 |
| H17 | 87 | 0.985 |
| H18 | 101 | 0.984 |
| H19 | 115 | 0.983 |
| H20 | 141 | 0.979 |
| H21 | 99 | 0.976 |
| H22 | 85 | 0.970 |
| H23 | 80 | 0.964 |
| H24 | 70 | 0.963 |
| H25 | 73 | 0.955 |
| H26 | 100 | 0.954 |
| Else | 118 | 0.948 |
|  | 2071 (Sum) | 0.975 (Overall) |

Table S5.3. Case distribution and CRISP performance across histotechnologist subgroups.

| Task | Cases | AUROC | Accuracy | F1 |
| --- | --- | --- | --- | --- |
| PNBM | 61 | 0.992 (0.977, 1.000) | 0.967 (0.918, 1.000) | 0.979 (0.944, 1.000) |
| TNBM | 184 | 0.942 (0.909, 0.974) | 0.853 (0.799, 0.897) | 0.852 (0.795, 0.905) |
| BNBM | 29 | 0.974 (0.920, 1.000) | 0.966 (0.897, 1.000) | 0.933 (0.750, 1.000) |
| CLMD | 37 | 1.000 (1.000, 1.000) | 1.000 (1.000, 1.000) | 1.000 (1.000, 1.000) |
| SLMD | 23 | 0.944 (0.860, 1.000) | 0.870 (0.739, 1.000) | 0.880 (0.720, 1.000) |
| BSMA | 37 | 0.926 (0.794, 1.000) | 0.919 (0.811, 1.000) | 0.857 (0.667, 1.000) |
| Overall | 371 | 0.936 (0.912, 0.959) | 0.846 (0.809, 0.884) | 0.846 (0.807, 0.885) |

Table S5.4. CRISP performance on challenging cases across tasks.

| Task | Cases | AUROC | Accuracy | F1 |
| --- | --- | --- | --- | --- |
| PNBM | 155 | 0.975 (0.945, 1.000) | 0.948 (0.910, 0.981) | 0.969 (0.944, 0.987) |
| TNBM | 218 | 0.943 (0.907, 0.980) | 0.858 (0.807, 0.899) | 0.897 (0.857, 0.932) |
| BNBM | 40 | 1.000 (1.000, 1.000) | 1.000 (1.000, 1.000) | 1.000 (1.000, 1.000) |
| CLMD | 44 | 1.000 (1.000, 1.000) | 1.000 (1.000, 1.000) | 1.000 (1.000, 1.000) |
| SLMD | 21 | 0.954 (0.875, 1.000) | 0.905 (0.762, 1.000) | 0.909 (0.750, 1.000) |
| BSMA | 32 | 0.996 (0.984, 1.000) | 0.969 (0.906, 1.000) | 0.974 (0.914, 1.000) |
| Overall | 510 | 0.963 (0.946, 0.979) | 0.898 (0.871, 0.924) | 0.925 (0.902, 0.945) |

Table S5.5. CRISP performance in IHC-requiring cases across tasks.
